# Supplementary material for: Identification of Differentially Expressed Genes through Integrated Study of Alzheimer’s Disease Affected Brain Regions
Source: PLoS One. 2016 Apr 6;11(4):e0152342. doi: 10.1371/journal.pone.0152342 (PMC4822961; doi:10.1371/journal.pone.0152342)
Supplement: S7 Table — Results for the integration of data from five regions, integrating only by regions (Coloured (α,β)-k) and by region and shared samples (Generalised (α,β)-k). The common probes between these two approaches are marked. The EASE annotated pathways are also given in this file. (XLS) [file pone.0152342.s009.xls]

## Sheet: Details
CABK	Result of combined analysis using coloured and generalised (alfa, beta)-k Feature set approach
GABK
Probe ID	The list of probes resulted from coloured (alfa, beta)-k feature set approach
Gene name and symbol	The name and the symbol of genes corresponding to each probe.
Common with GABK	The probes which are common with generalised (alfa, beta)-k feature set approach result
Common with CABK	The probes which are common with coloured (alfa, beta)-k feature set approach result
CABK-Pathwys	Pathway analysis result of coloured and generalised (alfa, beta)-k Feature set approach results
GABK-Pathways
Pathway name	name of the pathway
List hits	The number of genes that involved in corresponding pathway
List total	Total number of genes
EASE Score	A modified version of Fisher Exact p-value used for gene-enrichment analysis, to identify the dysregulated pathways.
Gene List	The list of genes from our list that participate in the corresponding pathway

## Sheet: CABK
Probe ID	Gene Name	Symbol	Common with GABK
1316_at	thyroid hormone receptor, alpha	THRA	X
1552507_at	potassium channel, voltage gated subfamily E regulatory beta subunit 4	KCNE4	X
1552689_at	CASK interacting protein 1	CASKIN1
1552892_at	tumor necrosis factor receptor superfamily, member 13C	TNFRSF13C
1553186_x_at	RAS and EF-hand domain containing	RASEF	X
1553693_s_at	carbonyl reductase 4	CBR4	X
1554593_s_at	solute carrier family 1 (high affinity aspartate/glutamate transporter), member 6	SLC1A6	X
1555495_a_at	CWC27 spliceosome-associated protein homolog (S. cerevisiae)	CWC27	X
1555923_a_at	cancer susceptibility candidate 10	CASC10
1556690_s_at	Data not found		X
1557155_a_at	Data not found		X
1557293_at	long intergenic non-protein coding RNA 969	LINC00969	X
1557895_at	FLJ35934	FLJ35934	X
1558279_a_at	3-ketodihydrosphingosine reductase	KDSR	X
1558345_a_at	uncharacterized LOC439911	LOC439911
1558678_s_at	metastasis associated lung adenocarcinoma transcript 1 (non-protein coding)	MALAT1	X
1558695_at	Data not found		X
1558783_at	Data not found
1558792_x_at	adaptor-related protein complex 2, alpha 1 subunit	AP2A1	X
1558831_x_at	Data not found		X
1559003_a_at	coiled-coil domain containing 163, pseudogene	CCDC163P
1559060_a_at	folliculin interacting protein 1	FNIP1	X
1559259_at	Data not found
1559391_s_at	Data not found		X
1559496_at	pyrophosphatase (inorganic) 2	PPA2
1559949_at	Data not found		X
1560116_a_at	neural precursor cell expressed, developmentally down-regulated 1	NEDD1	X
1560689_s_at	v-akt murine thymoma viral oncogene homolog 2	AKT2	X
1560741_at	small nuclear ribonucleoprotein polypeptide N	SNRPN	X
1560982_at	Data not found
1561158_at	Data not found		X
1561346_at	Data not found		X
1561657_at	Data not found		X
1561686_at	Data not found		X
1562201_x_at	Data not found
1562280_at	Data not found		X
1562416_at	Data not found		X
1562898_at	Data not found		X
1563781_at	hypothetical protein LOC285949	LOC285949	X
1563881_at	Data not found		X
1564378_a_at	Data not found
1565620_at	ArfGAP with GTPase domain, ankyrin repeat and PH domain 4	AGAP4	X
1566303_s_at	protein phosphatase 1, regulatory (inhibitor) subunit 11	PPP1R11
1566480_x_at	chromosome 17 open reading frame 104	C17orf104	X
1568603_at	Ca++-dependent secretion activator	CADPS	X
1568612_at	gamma-aminobutyric acid (GABA) A receptor, gamma 2	GABRG2	X
1568763_s_at	In multiple Geneids		X
1568877_a_at	acyl-CoA binding domain containing 5	ACBD5	X
1569200_at	Data not found		X
1569302_at	centrosomal protein 295kDa	CEP295	X
1569477_at	Data not found
1569482_at	Data not found		X
1569661_at	neuronal PAS domain protein 3	NPAS3	X
1570210_x_at	protein phosphatase 6, regulatory subunit 2	PPP6R2	X
200039_s_at	proteasome (prosome, macropain) subunit, beta type, 2	PSMB2	X
200042_at	RNA 2',3'-cyclic phosphate and 5'-OH ligase	RTCB	X
200047_s_at	YY1 transcription factor	YY1	X
200053_at	sperm associated antigen 7	SPAG7	X
200072_s_at	heterogeneous nuclear ribonucleoprotein M	HNRNPM	X
200085_s_at	transcription elongation factor B (SIII), polypeptide 2 (18kDa, elongin B)	TCEB2	X
200089_s_at	ribosomal protein L4	RPL4
200098_s_at	anaphase promoting complex subunit 5	ANAPC5	X
200625_s_at	CAP, adenylate cyclase-associated protein 1 (yeast)	CAP1	X
200639_s_at	tyrosine 3-monooxygenase/tryptophan 5-monooxygenase activation protein, zeta	YWHAZ	X
200640_at	tyrosine 3-monooxygenase/tryptophan 5-monooxygenase activation protein, zeta	YWHAZ	X
200685_at	serine/arginine-rich splicing factor 11	SRSF11	X
200693_at	tyrosine 3-monooxygenase/tryptophan 5-monooxygenase activation protein, theta	YWHAQ	X
200708_at	glutamic-oxaloacetic transaminase 2, mitochondrial	GOT2	X
200720_s_at	ARP1 actin-related protein 1 homolog A, centractin alpha (yeast)	ACTR1A
200732_s_at	protein tyrosine phosphatase type IVA, member 1	PTP4A1	X
200754_x_at	serine/arginine-rich splicing factor 2	SRSF2	X
200771_at	laminin, gamma 1 (formerly LAMB2)	LAMC1	X
200775_s_at	heterogeneous nuclear ribonucleoprotein K	HNRNPK	X
200799_at	heat shock 70kDa protein 1A	HSPA1A
200822_x_at	triosephosphate isomerase 1	TPI1	X
200954_at	ATPase, H+ transporting, lysosomal 16kDa, V0 subunit c	ATP6V0C	X
200966_x_at	aldolase A, fructose-bisphosphate	ALDOA
200976_s_at	Tax1 (human T-cell leukemia virus type I) binding protein 1	TA	X
200980_s_at	pyruvate dehydrogenase (lipoamide) alpha 1	PDHA1	X
201057_s_at	golgin B1	GOLGB1	X
201065_s_at	In multiple Geneids		X
201067_at	proteasome (prosome, macropain) 26S subunit, ATPase, 2	PSMC2	X
201083_s_at	BCL2-associated transcription factor 1	BCLAF1	X
201145_at	HCLS1 associated protein		X
201146_at	nuclear factor, erythroid 2-like 2	NFE2L2	X
201160_s_at	Y box binding protein 3	YB
201182_s_at	chromodomain helicase DNA binding protein 4	CHD4	X
201191_at	phosphatidylinositol transfer protein, alpha	PITPNA
201217_x_at	ribosomal protein L3	RPL3	X
201242_s_at	ATPase, Na+/K+ transporting, beta 1 polypeptide	ATP1B1
201290_at	SEC11 homolog A (S. cerevisiae)	SEC11A	X
201305_x_at	acidic (leucine-rich) nuclear phosphoprotein 32 family, member B	ANP32B	X
201324_at	epithelial membrane protein 1	EMP1	X
201371_s_at	cullin 3	CUL3	X
201400_at	proteasome (prosome, macropain) subunit, beta type, 3	PSMB3	X
201410_at	pleckstrin homology domain containing, family B (evectins) member 2	PLEKHB2	X
201415_at	glutathione synthetase	GSS	X
201434_at	tetratricopeptide repeat domain 1	TTC1	X
201441_at	cytochrome c oxidase subunit VIb polypeptide 1 (ubiquitous)	CO	X
201500_s_at	protein phosphatase 1, regulatory (inhibitor) subunit 11	PPP1R11	X
201509_at	isocitrate dehydrogenase 3 (NAD+) beta	IDH3B	X
201527_at	ATPase, H+ transporting, lysosomal 14kDa, V1 subunit F	ATP6V1F	X
201548_s_at	lysine (K)-specific demethylase 5B	KDM5B	X
201565_s_at	inhibitor of DNA binding 2, dominant negative helix-loop-helix protein	ID2
201570_at	SAMM50 sorting and assembly machinery component	SAMM50	X
201586_s_at	splicing factor proline/glutamine-rich	SFPQ	X
201622_at	staphylococcal nuclease and tudor domain containing 1	SND1	X
201636_at	fragile		X
201648_at	Janus kinase 1	JAK1
201704_at	ectonucleoside triphosphate diphosphohydrolase 6 (putative)	ENTPD6	X
201709_s_at	nipsnap homolog 1 (C. elegans)	NIPSNAP1	X
201751_at	Josephin domain containing 1	JOSD1
201810_s_at	SH3-domain binding protein 5 (BTK-associated)	SH3BP5	X
201828_x_at	family with sequence similarity 127, member A	FAM127A	X
201836_s_at	suppressor of Ty 7 (S. cerevisiae)-like	SUPT7L	X
201854_s_at	ATM interactor	ATMIN
201964_at	senataxin	SET
201987_at	mediator complex subunit 13	MED13
201991_s_at	kinesin family member 5B	KIF5B	X
202025_x_at	acetyl-CoA acyltransferase 1	ACAA1	X
202066_at	protein tyrosine phosphatase, receptor type, f polypeptide (PTPRF), interacting protein (liprin), alpha 1	PPFIA1
202070_s_at	isocitrate dehydrogenase 3 (NAD+) alpha	IDH3A	X
202120_x_at	adaptor-related protein complex 2, sigma 1 subunit	AP2S1	X
202121_s_at	charged multivesicular body protein 2A	CHMP2A	X
202135_s_at	ARP1 actin-related protein 1 homolog B, centractin beta (yeast)	ACTR1B	X
202138_x_at	aminoacyl tRNA synthetase complex-interacting multifunctional protein 2	AIMP2	X
202144_s_at	adenylosuccinate lyase	ADSL	X
202160_at	CREB binding protein	CREBBP	X
202178_at	protein kinase C, zeta	PRKCZ	X
202201_at	biliverdin reductase B	BLVRB	X
202330_s_at	uracil-DNA glycosylase	UNG	X
202360_at	mastermind-like 1 (Drosophila)	MAML1	X
202416_at	DnaJ (Hsp40) homolog, subfamily C, member 7	DNAJC7
202464_s_at	6-phosphofructo-2-kinase/fructose-2,6-biphosphatase 3	PFKFB3
202471_s_at	isocitrate dehydrogenase 3 (NAD+) gamma	IDH3G
202505_at	small nuclear ribonucleoprotein polypeptide B	SNRPB2	X
202534_x_at	dihydrofolate reductase	DHFR	X
202551_s_at	cysteine rich transmembrane BMP regulator 1 (chordin-like)	CRIM1	X
202594_at	leptin receptor overlapping transcript-like 1	LEPROTL1	X
202623_at	E2F-associated phosphoprotein	EAPP
202660_at	inositol 1,4,5-trisphosphate receptor, type 2	ITPR2
202704_at	transducer of ERBB2, 1	TOB1
202712_s_at	In multiple Geneids		X
202717_s_at	cell division cycle 16	CDC16	X
202785_at	NADH dehydrogenase (ubiquinone) 1 alpha subcomplex, 7, 14.5kDa	NDUFA7
202820_at	aryl hydrocarbon receptor	AHR	X
202829_s_at	vesicle-associated membrane protein 7	VAMP7	X
202858_at	U2 small nuclear RNA auxiliary factor 1	U2AF1	X
202868_s_at	processing of precursor 4, ribonuclease P/MRP subunit (S. cerevisiae)	POP4	X
202927_at	peptidylprolyl cis/trans isomerase, NIMA-interacting 1	PIN1	X
202961_s_at	ATP synthase, H+ transporting, mitochondrial Fo complex, subunit F2	ATP5J2	X
202974_at	membrane protein, palmitoylated 1, 55kDa	MPP1	X
203031_s_at	uroporphyrinogen III synthase	UROS	X
203068_at	kelch-like family member 21	KLHL21	X
203082_at	BMS1 ribosome biogenesis factor	BMS1	X
203113_s_at	eukaryotic translation elongation factor 1 delta (guanine nucleotide exchange protein)	EEF1D	X
203122_at	trafficking protein particle complex 12	TRAPPC12	X
203132_at	retinoblastoma 1	RB1	X
203140_at	B-cell CLL/lymphoma 6	BCL6	X
203146_s_at	gamma-aminobutyric acid (GABA) B receptor, 1	GABBR1	X
203255_at	F-box protein 11	FB
203297_s_at	jumonji, AT rich interactive domain 2	JARID2	X
203324_s_at	caveolin 2	CAV2
203431_s_at	Rho GTPase activating protein 32	ARHGAP32	X
203466_at	MpV17 mitochondrial inner membrane protein	MPV17	X
203468_at	cyclin-dependent kinase 10	CDK10
203482_at	family with sequence similarity 178, member A	FAM178A
203485_at	reticulon 1	RTN1	X
203509_at	sortilin-related receptor, L(DLR class) A repeats containing	SORL1	X
203549_s_at	lipoprotein lipase	LPL	X
203603_s_at	zinc finger E-box binding homeobox 2	ZEB2
203606_at	NADH dehydrogenase (ubiquinone) Fe-S protein 6, 13kDa (NADH-coenzyme Q reductase)	NDUFS6	X
203752_s_at	jun D proto-oncogene	JUND	X
203753_at	transcription factor 4	TCF4
203773_x_at	biliverdin reductase A	BLVRA	X
203814_s_at	NAD(P)H dehydrogenase, quinone 2	NQO2	X
203849_s_at	kinesin family member 1A	KIF1A	X
203909_at	solute carrier family 9, subfamily A (NHE6, cation proton antiporter 6), member 6	SLC9A6	X
203911_at	RAP1 GTPase activating protein	RAP1GAP	X
203944_x_at	butyrophilin, subfamily 2, member A1	BTN2A1
203956_at	MORC family CW-type zinc finger 2	MORC2	X
204229_at	solute carrier family 17 (vesicular glutamate transporter), member 7	SLC17A7	X
204266_s_at	choline kinase alpha	CHKA	X
204270_at	SKI proto-oncogene	SKI	X
204321_at	neogenin 1	NEO1	X
204466_s_at	synuclein, alpha (non A4 component of amyloid precursor)	SNCA	X
204481_at	bromodomain and PHD finger containing, 1	BRPF1	X
204517_at	peptidylprolyl isomerase C (cyclophilin C)	PPIC	X
204528_s_at	nucleosome assembly protein 1-like 1	NAP1L1	X
204552_at	inositol polyphosphate-4-phosphatase, type I, 107kDa	INPP4A	X
204559_s_at	LSM7 homolog, U6 small nuclear RNA associated (S. cerevisiae)	LSM7	X
204584_at	L1 cell adhesion molecule	L1CAM	X
204587_at	solute carrier family 25 (mitochondrial carrier, brain), member 14	SLC25A14
204622_x_at	nuclear receptor subfamily 4, group A, member 2	NR4A2	X
204663_at	malic enzyme 3, NADP(+)-dependent, mitochondrial	ME3	X
204680_s_at	Rap guanine nucleotide exchange factor (GEF) 5	RAPGEF5	X
204718_at	EPH receptor B6	EPHB6	X
204720_s_at	DnaJ (Hsp40) homolog, subfamily C, member 6	DNAJC6	X
204731_at	transforming growth factor, beta receptor III	TGFBR3	X
204786_s_at	interferon (alpha, beta and omega) receptor 2	IFNAR2	X
204957_at	origin recognition complex, subunit 5	ORC5	X
204977_at	DEAD (Asp-Glu-Ala-Asp) box polypeptide 10	DD	X
205117_at	fibroblast growth factor 1 (acidic)	FGF1	X
205230_at	rabphilin 3A	RPH3A
205257_s_at	amphiphysin	AMPH	X
205273_s_at	pitrilysin metallopeptidase 1	PITRM1
205353_s_at	phosphatidylethanolamine binding protein 1	PEBP1	X
205434_s_at	AP2 associated kinase 1	AAK1
205514_at	zinc finger protein 415	ZNF415	X
205559_s_at	proprotein convertase subtilisin/kexin type 5	PCSK5	X
205570_at	phosphatidylinositol-5-phosphate 4-kinase, type II, alpha	PIP4K2A	X
205594_at	zinc finger protein 652	ZNF652	X
205609_at	angiopoietin 1	ANGPT1
205751_at	SH3-domain GRB2-like 2	SH3GL2	X
205787_x_at	zinc finger CCCH-type containing 11A	ZC3H11A	X
205816_at	integrin, beta 8	ITGB8	X
205967_at	histone cluster 1, H4c	HIST1H4C	X
206122_at	SRY (sex determining region Y)-box 15	SO	X
206140_at	LIM homeobox 2	LH	X
206273_at	slowmo homolog 1 (Drosophila)	SLMO1	X
206307_s_at	forkhead box D1	FO	X
206547_s_at	protein phosphatase, EF-hand calcium binding domain 1	PPEF1	X
206562_s_at	casein kinase 1, alpha 1	CSNK1A1	X
206652_at	zinc finger, MYM-type 5	ZMYM5	X
207081_s_at	phosphatidylinositol 4-kinase, catalytic, alpha	PI4KA	X
207084_at	POU class 3 homeobox 2	POU3F2	X
207132_x_at	prefoldin subunit 5	PFDN5	X
207598_x_at			X
207789_s_at	dipeptidyl-peptidase 6	DPP6	X
207966_s_at	golgi glycoprotein 1	GLG1	X
208549_x_at	prothymosin, alpha	PTMA	X
208611_s_at	spectrin, alpha, non-erythrocytic 1	SPTAN1	X
208687_x_at	heat shock 70kDa protein 8	HSPA8
208704_x_at	amyloid beta (A4) precursor-like protein 2	APLP2	X
208709_s_at	nardilysin (N-arginine dibasic convertase)	NRD1
208710_s_at	adaptor-related protein complex 3, delta 1 subunit	AP3D1	X
208720_s_at	RNA binding motif protein 39	RBM39
208732_at	RAB2A, member RAS oncogene family	RAB2A	X
208827_at	proteasome (prosome, macropain) subunit, beta type, 6	PSMB6
208835_s_at	LUC7-like 3 (S. cerevisiae)	LUC7L3	X
208859_s_at	alpha thalassemia/mental retardation syndrome		X
208887_at	eukaryotic translation initiation factor 3, subunit G	EIF3G
208936_x_at	lectin, galactoside-binding, soluble, 8	LGALS8	X
208942_s_at	SEC62 homolog (S. cerevisiae)	SEC62	X
208955_at	deoxyuridine triphosphatase	DUT	X
208969_at	NADH dehydrogenase (ubiquinone) 1 alpha subcomplex, 9, 39kDa	NDUFA9	X
208972_s_at	ATP synthase, H+ transporting, mitochondrial Fo complex, subunit C1 (subunit 9)	ATP5G1	X
208996_s_at	polymerase (RNA) II (DNA directed) polypeptide C, 33kDa	POLR2C	X
209001_s_at	anaphase promoting complex subunit 13	ANAPC13	X
209023_s_at	stromal antigen 2	STAG2	X
209026_x_at	tubulin, beta class I	TUBB
209066_x_at	ubiquinol-cytochrome c reductase binding protein	UQCRB	X
209079_x_at	In multiple Geneids		X
209163_at	cytochrome b561	CYB561	X
209164_s_at	cytochrome b561	CYB561	X
209169_at	glycoprotein M6B	GPM6B	X
209177_at	NADH dehydrogenase (ubiquinone) complex I, assembly factor 3	NDUFAF3	X
209225_x_at	transportin 1	TNPO1	X
209250_at	delta(4)-desaturase, sphingolipid 1	DEGS1	X
209251_x_at	tubulin, alpha 1c	TUBA1C	X
209258_s_at	structural maintenance of chromosomes 3	SMC3	X
209268_at	vacuolar protein sorting 45 homolog (S. cerevisiae)	VPS45	X
209289_at	nuclear factor I/B	NFIB	X
209316_s_at	HBS1-like translational GTPase	HBS1L	X
209343_at	EF-hand domain family, member D1	EFHD1	X
209409_at	growth factor receptor-bound protein 10	GRB10	X
209440_at	phosphoribosyl pyrophosphate synthetase 1	PRPS1	X
209534_x_at	A kinase (PRKA) anchor protein 13	AKAP13	X
209553_at	vacuolar protein sorting 8 homolog (S. cerevisiae)	VPS8	X
209558_s_at	In multiple Geneids		X
209583_s_at	CD200 molecule	CD200	X
209586_s_at	prune exopolyphosphatase	PRUNE	X
209609_s_at	mitochondrial ribosomal protein L9	MRPL9	X
209686_at	S100 calcium binding protein B	S100B	X
209715_at	chromobox homolog 5	CB	X
209751_s_at	In multiple Geneids		X
209814_at	zinc finger protein 330	ZNF330
209991_x_at	gamma-aminobutyric acid (GABA) B receptor, 2	GABBR2	X
210111_s_at	PNAS-119	LOC100287552	X
210268_at	nuclear transcription factor,		X
210425_x_at	golgin A8 family, member B	GOLGA8B
210679_x_at	Data not found		X
210686_x_at	solute carrier family 25 (mitochondrial carrier), member 16	SLC25A16	X
210701_at	craniofacial development protein 1	CFDP1	X
210825_s_at	phosphatidylethanolamine binding protein 1	PEBP1	X
210840_s_at	IQ motif containing GTPase activating protein 1	IQGAP1	X
210908_s_at	prefoldin subunit 5	PFDN5	X
210976_s_at	phosphofructokinase, muscle	PFKM	X
210987_x_at	tropomyosin 1 (alpha)	TPM1
211386_at	uncharacterized protein MGC12488	MGC12488	X
211464_x_at	caspase 6, apoptosis-related cysteine peptidase	CASP6	X
211616_s_at	5-hydroxytryptamine (serotonin) receptor 2A, G protein-coupled	HTR2A	X
211752_s_at	NADH dehydrogenase (ubiquinone) Fe-S protein 7, 20kDa (NADH-coenzyme Q reductase)	NDUFS7	X
211779_x_at	adaptor-related protein complex 2, alpha 2 subunit	AP2A2	X
211921_x_at	prothymosin, alpha	PTMA	X
211930_at	heterogeneous nuclear ribonucleoprotein A3	HNRNPA3	X
211964_at	collagen, type IV, alpha 2	COL4A2	X
211993_at	WNK lysine deficient protein kinase 1	WNK1	X
212017_at	family with sequence similarity 168, member B	FAM168B
212037_at	pinin, desmosome associated protein	PNN
212088_at	peptidase (mitochondrial processing) alpha	PMPCA	X
212089_at	lamin A/C	LMNA
212095_s_at	microtubule associated tumor suppressor 1	MTUS1	X
212104_s_at	RNA binding protein, fox-1 homolog (C. elegans) 2	RBFO	X
212114_at	ataxin 7-like 3B	AT	X
212177_at	PNN-interacting serine/arginine-rich protein	PNISR	X
212178_s_at	In multiple Geneids		X
212207_at	mediator complex subunit 13-like	MED13L	X
212209_at	mediator complex subunit 13-like	MED13L	X
212228_s_at	coenzyme Q9	COQ9	X
212252_at	calcium/calmodulin-dependent protein kinase kinase 2, beta	CAMKK2	X
212265_at	QKI, KH domain containing, RNA binding	QKI	X
212296_at	proteasome (prosome, macropain) 26S subunit, non-ATPase, 14	PSMD14	X
212322_at	sphingosine-1-phosphate lyase 1	SGPL1	X
212348_s_at	lysine (K)-specific demethylase 1A	KDM1A	X
212372_at	myosin, heavy chain 10, non-muscle	MYH10	X
212384_at	DEAD (Asp-Glu-Ala-Asp) box polypeptide 39B	DD	X
212432_at	GrpE-like 1, mitochondrial (E. coli)	GRPEL1	X
212450_at	SECIS binding protein 2-like	SECISBP2L	X
212451_at	SECIS binding protein 2-like	SECISBP2L	X
212462_at	K(lysine) acetyltransferase 6B	KAT6B	X
212468_at	sperm associated antigen 9	SPAG9	X
212483_at	Nipped-B homolog (Drosophila)	NIPBL	X
212491_s_at	DnaJ (Hsp40) homolog, subfamily C, member 8	DNAJC8	X
212501_at	CCAAT/enhancer binding protein (C/EBP), beta	CEBPB	X
212506_at	phosphatidylinositol binding clathrin assembly protein	PICALM	X
212512_s_at	coactivator-associated arginine methyltransferase 1	CARM1
212537_x_at	ribosomal protein L17	RPL17
212581_x_at	glyceraldehyde-3-phosphate dehydrogenase	GAPDH	X
212645_x_at	brain and reproductive organ-expressed (TNFRSF1A modulator)	BRE	X
212652_s_at	sorting nexin 4	SN	X
212673_at	methionyl aminopeptidase 1	METAP1	X
212727_at	discs, large homolog 3 (Drosophila)	DLG3
212787_at	YLP motif containing 1	YLPM1
212832_s_at	cytoskeleton associated protein 5	CKAP5	X
212852_s_at	TROVE domain family, member 2	TROVE2
212896_at	superkiller viralicidic activity 2-like 2 (S. cerevisiae)	SKIV2L2	X
212959_s_at	N-acetylglucosamine-1-phosphate transferase, alpha and beta subunits	GNPTAB
212992_at	AHNAK nucleoprotein 2	AHNAK2	X
212995_x_at	mitotic spindle organizing protein 2B	MZT2B	X
213015_at	bobby sox homolog (Drosophila)	BB	X
213032_at	nuclear factor I/B	NFIB
213039_at	Rho/Rac guanine nucleotide exchange factor (GEF) 18	ARHGEF18	X
213079_at	TSR2, 20S rRNA accumulation, homolog (S. cerevisiae)	TSR2	X
213089_at	uncharacterized LOC100272216	LOC100272216	X
213093_at	protein kinase C, alpha	PRKCA	X
213137_s_at	protein tyrosine phosphatase, non-receptor type 2	PTPN2
213195_at	LYR motif containing 9	LYRM9	X
213298_at	nuclear factor I/C (CCAAT-binding transcription factor)	NFIC	X
213315_x_at	chromosome
213421_x_at	protease, serine, 3	PRSS3	X
213453_x_at	glyceraldehyde-3-phosphate dehydrogenase	GAPDH	X
213457_at	malignant fibrous histiocytoma amplified sequence 1	MFHAS1	X
213476_x_at	tubulin, beta 3 class III	TUBB3
213517_at	poly(rC) binding protein 2	PCBP2	X
213535_s_at	ubiquitin-conjugating enzyme E2I	UBE2I	X
213545_x_at	sorting nexin 3	SN	X
213555_at	RWD domain containing 2A	RWDD2A
213668_s_at	SRY (sex determining region Y)-box 4	SO
213693_s_at	mucin 1, cell surface associated	MUC1	X
213710_s_at	calmodulin 1 (phosphorylase kinase, delta)	CALM1	X
213744_at	attractin-like 1	ATRNL1	X
213808_at	Data not found		X
214043_at	protein tyrosine phosphatase, receptor type, D	PTPRD	X
214246_x_at	misshapen-like kinase 1	MINK1	X
214375_at	In multiple Geneids		X
214394_x_at	eukaryotic translation elongation factor 1 delta (guanine nucleotide exchange protein)	EEF1D	X
214432_at	ATPase, Na+/K+ transporting, alpha 3 polypeptide	ATP1A3
214436_at	F-box and leucine-rich repeat protein 2	FB	X
214439_x_at	bridging integrator 1	BIN1
214499_s_at	BCL2-associated transcription factor 1	BCLAF1	X
214594_x_at	ATPase, aminophospholipid transporter, class I, type 8B, member 1	ATP8B1	X
214623_at	F-box and WD repeat domain containing 4 pseudogene 1	FB	X
214687_x_at	aldolase A, fructose-bisphosphate	ALDOA
214707_x_at	Alstrom syndrome protein 1	ALMS1	X
214743_at	cut-like homeobox 1	CU	X
214799_at	neurofascin	NFASC	X
214823_at	zinc finger protein 204, pseudogene	ZNF204P	X
214850_at	glucuronidase, beta pseudogene	LOC100170939	X
214934_at	ATPase, class II, type 9B	ATP9B	X
215021_s_at	neurexin 3	NR	X
215091_s_at	general transcription factor IIIA	GTF3A	X
215167_at	mediator complex subunit 14	MED14	X
215280_s_at	protein tyrosine phosphatase, receptor type, f polypeptide (PTPRF), interacting protein (liprin), alpha 3	PPFIA3	X
215306_at	Data not found		X
215344_at	Data not found
215383_x_at	spastic paraplegia 21 (autosomal recessive, Mast syndrome)	SPG21	X
215385_at	Data not found		X
215493_x_at	butyrophilin, subfamily 2, member A1	BTN2A1	X
215504_x_at	Data not found		X
215514_at	Data not found		X
215543_s_at	like-glycosyltransferase	LARGE	X
215553_x_at	Data not found		X
215600_x_at	F-box and WD repeat domain containing 12	FB	X
215698_at	lysine (K)-specific demethylase 5A	KDM5A	X
215789_s_at	adherens junctions associated protein 1	AJAP1
215889_at	SKI-like proto-oncogene	SKIL	X
215963_x_at	In multiple Geneids		X
216101_at	Data not found		X
216308_x_at	glyoxylate reductase/hydroxypyruvate reductase	GRHPR	X
216384_x_at	In multiple Geneids
216524_x_at	Data not found		X
216527_at	Data not found		X
216550_x_at	ankyrin repeat domain 12	ANKRD12	X
216745_x_at	Data not found		X
217028_at	chemokine (C-		X
217077_s_at	gamma-aminobutyric acid (GABA) B receptor, 2	GABBR2	X
217250_s_at	chromodomain helicase DNA binding protein 5	CHD5	X
217398_x_at	glyceraldehyde-3-phosphate dehydrogenase	GAPDH	X
217482_at	Data not found		X
217713_x_at	Data not found		X
217721_at	Data not found
217726_at	coatomer protein complex, subunit zeta 1	COPZ1	X
217759_at	tripartite motif containing 44	TRIM44
217761_at	acireductone dioxygenase 1	ADI1	X
217819_at	golgin A7	GOLGA7	X
217860_at	In multiple Geneids		X
217871_s_at	macrophage migration inhibitory factor (glycosylation-inhibiting factor)	MIF	X
217904_s_at	beta-site APP-cleaving enzyme 1	BACE1	X
217927_at	signal peptidase complex subunit 1 homolog (S. cerevisiae)	SPCS1	X
217937_s_at	histone deacetylase 7	HDAC7	X
217939_s_at	aftiphilin	AFTPH	X
217946_s_at	SUMO1 activating enzyme subunit 1	SAE1	X
217969_at	vacuolar protein sorting 51 homolog (S. cerevisiae)	VPS51	X
218026_at	cytochrome c oxidase assembly factor 3	COA3	X
218048_at	COMM domain containing 3	COMMD3	X
218247_s_at	mex-3 RNA binding family member C	ME	X
218271_s_at	presenilin associated, rhomboid-like	PARL	X
218298_s_at	chromosome 14 open reading frame 159	C14orf159	X
218302_at	presenilin enhancer gamma secretase subunit	PSENEN	X
218330_s_at	neuron navigator 2	NAV2	X
218381_s_at	U2 small nuclear RNA auxiliary factor 2	U2AF2	X
218520_at	TANK-binding kinase 1	TBK1	X
218522_s_at	microtubule-associated protein 1S	MAP1S	X
218543_s_at	poly (ADP-ribose) polymerase family, member 12	PARP12	X
218679_s_at	vacuolar protein sorting 28 homolog (S. cerevisiae)	VPS28
218843_at	fibronectin type III domain containing 4	FNDC4	X
218865_at	mitochondrial amidoxime reducing component 1	2001-03-01	X
218953_s_at	prenylcysteine oxidase 1 like	PCYO	X
219019_at	p53-induced death domain protein 1	PIDD1	X
219028_at	homeodomain interacting protein kinase 2	HIPK2	X
219032_x_at	opsin 3	OPN3	X
219108_x_at	In multiple Geneids
219203_at	ER membrane protein complex subunit 9	EMC9
219204_s_at	serine racemase	SRR	X
219387_at	coiled-coil domain containing 88A	CCDC88A	X
219389_at	sushi domain containing 4	SUSD4	X
219670_at	BEN domain containing 5	BEND5	X
219671_at	hippocalcin like 4	HPCAL4	X
219709_x_at	family with sequence similarity 173, member A	FAM173A	X
219961_s_at	kizuna centrosomal protein	KIZ	X
220071_x_at	HAUS augmin-like complex, subunit 2	HAUS2	X
220072_at	centrosome and spindle pole associated protein 1	CSPP1	X
220081_x_at	hydroxysteroid (17-beta) dehydrogenase 7	HSD17B7	X
220136_s_at	crystallin, beta A2	CRYBA2	X
220269_at	zinc finger, B-box domain containing	ZBB	X
220295_x_at	DEP domain containing 1	DEPDC1	X
220316_at	neuronal PAS domain protein 3	NPAS3	X
220609_at	SUMO-interacting motifs containing 1 pseudogene	LOC202181	X
220615_s_at	fatty acyl CoA reductase 2	FAR2	X
220942_x_at	family with sequence similarity 162, member A	FAM162A	X
220966_x_at	actin related protein 2/3 complex, subunit 5-like	ARPC5L	X
221476_s_at	ribosomal protein L15	RPL15	X
221486_at	endosulfine alpha	ENSA	X
221488_s_at	cutA divalent cation tolerance homolog (E. coli)	CUTA	X
221497_x_at	egl-9 family hypoxia-inducible factor 1	EGLN1	X
221506_s_at	transportin 2	TNPO2	X
221526_x_at	par-3 family cell polarity regulator	PARD3
221702_s_at	TM2 domain containing 3	TM2D3
221772_s_at	protein phosphatase 2, regulatory subunit B, delta	PPP2R2D	X
221853_s_at	In multiple Geneids		X
221864_at	ORAI calcium release-activated calcium modulator 3	ORAI3	X
221877_at	immunity-related GTPase family, Q	IRGQ	X
221886_at	DENN/MADD domain containing 2A	DENND2A	X
221942_s_at	guanylate cyclase 1, soluble, alpha 3	GUCY1A3	X
221952_x_at	tRNA methyltransferase 5	TRMT5	X
222024_s_at	A kinase (PRKA) anchor protein 13	AKAP13	X
222043_at	clusterin	CLU	X
222047_s_at	serrate, RNA effector molecule	SRRT	X
222154_s_at	spermatogenesis associated, serine-rich 2-like	SPATS2L	X
222160_at	A kinase (PRKA) anchor protein 8-like	AKAP8L	X
222284_at	Data not found		X
222294_s_at	Data not found
222364_at	solute carrier family 44 (choline transporter), member 1	SLC44A1	X
222380_s_at	programmed cell death 6	PDCD6	X
222395_s_at	ubiquitin-conjugating enzyme E2Z	UBE2Z	X
222428_s_at	leucyl-tRNA synthetase	LARS	X
222439_s_at	thyroid hormone receptor associated protein 3	THRAP3	X
222457_s_at	LIM domain and actin binding 1	LIMA1	X
222513_s_at	sorbin and SH3 domain containing 1	SORBS1	X
222610_s_at	S100P binding protein	S100PBP	X
222651_s_at	trichorhinophalangeal syndrome I	TRPS1	X
222728_s_at	TATA box binding protein (TBP)-associated factor, RNA polymerase I, D, 41kDa	TAF1D
222745_s_at	katanin p80 subunit B-like 1	KATNBL1	X
222780_s_at	brain and acute leukemia, cytoplasmic	BAALC
222809_x_at	coiled-coil domain containing 85C	CCDC85C	X
222982_x_at	solute carrier family 38, member 2	SLC38A2	X
223024_at	adaptor-related protein complex 1, mu 1 subunit	AP1M1	X
223026_s_at	vacuolar protein sorting 29 homolog (S. cerevisiae)	VPS29
223035_s_at	phenylalanyl-tRNA synthetase, beta subunit	FARSB	X
223037_at	PDZ domain containing 11	PDZD11	X
223134_at	bobby sox homolog (Drosophila)	BB	X
223185_s_at	basic helix-loop-helix family, member e41	BHLHE41	X
223219_s_at	CCR4-NOT transcription complex, subunit 10	CNOT10
223319_at	gephyrin	GPHN	X
223380_s_at	large tumor suppressor kinase 2	LATS2	X
223461_at	TBC1 domain family, member 7	TBC1D7
223480_s_at	mitochondrial ribosomal protein L47	MRPL47	X
223519_at	sterile alpha motif and leucine zipper containing kinase AZK	ZAK	X
223673_at	regulatory factor		X
223679_at	catenin (cadherin-associated protein), beta 1, 88kDa	CTNNB1	X
223940_x_at	metastasis associated lung adenocarcinoma transcript 1 (non-protein coding)	MALAT1
224151_s_at	adenylate kinase 3	AK3	X
224187_x_at	heat shock 70kDa protein 8	HSPA8
224227_s_at	B double prime 1, subunit of RNA polymerase III transcription initiation factor IIIB	BDP1	X
224366_s_at	RALBP1 associated Eps domain containing 1	REPS1	X
224369_s_at	F-box protein 38	FB	X
224414_s_at	caspase recruitment domain family, member 6	CARD6	X
224567_x_at	metastasis associated lung adenocarcinoma transcript 1 (non-protein coding)	MALAT1
224568_x_at	metastasis associated lung adenocarcinoma transcript 1 (non-protein coding)	MALAT1	X
224569_s_at	interferon regulatory factor 2 binding protein 2	IRF2BP2
224598_at	mannosyl (alpha-1,3-)-glycoprotein beta-1,4-N-acetylglucosaminyltransferase, isozyme B	MGAT4B	X
224613_s_at	DnaJ (Hsp40) homolog, subfamily C, member 5	DNAJC5	X
224628_at	endoplasmic reticulum lectin 1	ERLEC1	X
224666_at	non-SMC element 1 homolog (S. cerevisiae)	NSMCE1	X
224689_at	mannosidase, beta A, lysosomal-like	MANBAL	X
224736_at	cell division cycle and apoptosis regulator 1	CCAR1
224737_x_at	cell division cycle and apoptosis regulator 1	CCAR1	X
224739_at	Pim-3 proto-oncogene, serine/threonine kinase	PIM3	X
224771_at	neuron navigator 1	NAV1
224774_s_at	neuron navigator 1	NAV1	X
224862_at	guanine nucleotide binding protein (G protein), q polypeptide	GNAQ	X
224878_at	ubiquitin family domain containing 1	UBFD1	X
224972_at	reactive oxygen species modulator 1	ROMO1	X
224999_at	Data not found		X
225003_at	transmembrane protein 205	TMEM205	X
225050_at	zinc finger protein 512	ZNF512	X
225055_at	leucine rich repeat containing 37, member A16, pseudogene	LRRC37A16P	X
225092_at	rabaptin, RAB GTPase binding effector protein 1	RABEP1	X
225172_at	Crm, cramped-like (Drosophila)	CRAMP1L	X
225219_at	SMAD family member 5	SMAD5	X
225223_at	SMAD family member 5	SMAD5	X
225234_at	Cbl proto-oncogene, E3 ubiquitin protein ligase	CBL	X
225239_at	Data not found		X
225240_s_at	musashi RNA-binding protein 2	MSI2	X
225298_at	paroxysmal nonkinesigenic dyskinesia	PNKD	X
225356_at	Data not found		X
225463_x_at	G protein-coupled receptor 89A	GPR89A	X
225484_at	centrosomal protein 41kDa	CEP41	X
225493_at	uncharacterized LOC144438	LOC144438	X
225496_s_at	synaptotagmin-like 2	SYTL2	X
225501_at	PHD finger protein 6	PHF6	X
225516_at	solute carrier family 7 (cationic amino acid transporter, y+ system), member 2	SLC7A2	X
225571_at	leukemia inhibitory factor receptor alpha	LIFR	X
225636_at	signal transducer and activator of transcription 2, 113kDa	STAT2	X
225649_s_at	serine/threonine kinase 35	STK35	X
225655_at	ubiquitin-like with PHD and ring finger domains 1	UHRF1	X
225750_at	Data not found		X
225864_at	family with sequence similarity 84, member B	FAM84B	X
225870_s_at	trafficking protein particle complex 5	TRAPPC5	X
225917_at	Data not found		X
225923_at	Data not found		X
225961_at	kelch-like family member 42	KLHL42	X
226009_at	deleted in primary ciliary dyskinesia homolog (mouse)	DPCD
226037_s_at	TAF9B RNA polymerase II, TATA box binding protein (TBP)-associated factor, 31kDa	TAF9B	X
226086_at	synaptotagmin		X
226101_at	protein kinase C, epsilon	PRKCE	X
226112_at	sarcoglycan, beta (43kDa dystrophin-associated glycoprotein)	SGCB	X
226143_at	retinoic acid induced 1	RAI1	X
226169_at	SET binding factor 2	SBF2	X
226195_at	intraflagellar transport 43	IFT43	X
226223_at	Data not found		X
226447_at	ash1 (absent, small, or homeotic)-like (Drosophila)	ASH1L	X
226484_at	zinc finger and BTB domain containing 47	ZBTB47
226501_at			X
226544_x_at	biogenesis of lysosomal organelles complex-1, subunit 5, muted	BLOC1S5	X
226554_at	zinc finger and BTB domain containing 7A	ZBTB7A
226625_at	transforming growth factor, beta receptor III	TGFBR3	X
226690_at	adenylate cyclase activating polypeptide 1 (pituitary) receptor type I	ADCYAP1R1	X
226718_at	adhesion molecule with Ig-like domain 1	AMIGO1	X
226886_at	glutamine--fructose-6-phosphate transaminase 1	GFPT1	X
226892_at	chromosome 10 open reading frame 12	C10orf12
226895_at	nuclear factor I/C (CCAAT-binding transcription factor)	NFIC	X
226898_s_at	splicing factor proline/glutamine-rich	SFPQ	X
226999_at	RNA-binding region (RNP1, RRM) containing 3	RNPC3	X
227066_at	MOB kinase activator 3C	MOB3C	X
227084_at	dystrobrevin, alpha	DTNA	X
227435_at	KIAA2018	KIAA2018	X
227527_at	lysine (K)-specific methyltransferase 2D	KMT2D	X
227556_at	NME/NM23 family member 7	NME7	X
227585_at	ATPase family, AAA domain containing 1	ATAD1
227663_at	Data not found		X
227772_at	Data not found		X
227792_at	inositol 1,4,5-trisphosphate receptor interacting protein-like 2	ITPRIPL2	X
227798_at	SMAD family member 1	SMAD1	X
227802_at	RUN and FYVE domain containing 3	RUFY3	X
227847_at	EPM2A (laforin) interacting protein 1	EPM2AIP1	X
227891_s_at	TAF15 RNA polymerase II, TATA box binding protein (TBP)-associated factor, 68kDa	TAF15	X
227944_at	protein tyrosine phosphatase, non-receptor type 3	PTPN3	X
227959_at	Data not found		X
228007_at	centrosomal protein 85kDa-like	CEP85L	X
228010_at	protein phosphatase 2, regulatory subunit B, gamma	PPP2R2C
228029_at	zinc finger protein 721	ZNF721
228287_at	inhibitor of growth family, member 5	ING5	X
228487_s_at	Data not found		X
228556_at	YTH domain containing 1	YTHDC1	X
228594_at	NAD kinase 2, mitochondrial	NADK2	X
228662_at	suppressor of cytokine signaling 7	SOCS7	X
228839_s_at	uncharacterized LOC642361	LOC642361	X
228855_at	nudix (nucleoside diphosphate linked moiety		X
228858_at	Data not found
228974_at	Data not found		X
229065_at	solute carrier family 35, member F3	SLC35F3	X
229143_at	CCR4-NOT transcription complex, subunit 3	CNOT3	X
229145_at	anaphase promoting complex subunit 16	ANAPC16	X
229264_at	Data not found		X
229309_at	adrenoceptor beta 1	ADRB1	X
229315_at	Data not found		X
229353_s_at	nuclear casein kinase and cyclin-dependent kinase substrate 1	NUCKS1	X
229374_at	EPH receptor A4	EPHA4	X
229497_at	ankyrin repeat and death domain containing 1A	ANKDD1A	X
229531_at	Data not found		X
229537_at	LIM domain only 4	LMO4	X
229687_s_at	hypothetical protein LOC100287017	LOC100287017	X
229725_at	acyl-CoA synthetase long-chain family member 6	ACSL6	X
229966_at	EWS RNA-binding protein 1	EWSR1	X
230255_at	gamma-aminobutyric acid (GABA) A receptor, delta	GABRD	X
230280_at	tripartite motif containing 9	TRIM9	X
230296_at	chromosome 16 open reading frame 52	C16orf52	X
230379_x_at	NADH dehydrogenase (ubiquinone) complex I, assembly factor 7	NDUFAF7	X
230392_at	Data not found		X
230621_at	isoamyl acetate-hydrolyzing esterase 1 homolog (S. cerevisiae)	IAH1	X
230629_s_at	E1A binding protein p400	EP400
230656_s_at	cirrhosis, autosomal recessive 1A (cirhin)	CIRH1A	X
230713_at	Data not found		X
230790_x_at	Data not found		X
230885_at	spastic paraplegia 7 (pure and complicated autosomal recessive)	SPG7	X
230923_at	family with sequence similarity 19 (chemokine (C-C motif)-like), member A1	FAM19A1	X
231281_at	Data not found		X
231329_at	Data not found		X
231387_at	hypothetical protein LOC100289494	LOC100289494	X
231530_s_at	chromosome 11 open reading frame 1	C11orf1	X
231783_at	cholinergic receptor, muscarinic 1	CHRM1
231896_s_at	density-regulated protein	DENR
231986_at	regulating synaptic membrane exocytosis 1	RIMS1	X
232012_at	calpain 1, (mu/I) large subunit	CAPN1	X
232173_at	C-type lectin domain family 2, member L	CLEC2L	X
232215_x_at	proline rich 11	PRR11	X
232288_at	In multiple Geneids		X
232311_at	beta-2-microglobulin	B2M	X
232386_at	vacuolar protein sorting 13 homolog C (S. cerevisiae)	VPS13C	X
232653_at	Data not found		X
232735_at	ankyrin repeat domain 34A	ANKRD34A	X
232797_at	Data not found		X
233037_at	Data not found		X
233039_at	Data not found		X
233216_at	zinc finger, DHHC-type containing 21	ZDHHC21	X
233313_at	Data not found		X
233319_x_at	Data not found		X
233405_at	Data not found		X
233437_at	gamma-aminobutyric acid (GABA) A receptor, alpha 4	GABRA4	X
233647_s_at	cytidine and dCMP deaminase domain containing 1	CDADC1	X
233702_x_at	Data not found		X
233816_at	Data not found		X
233908_x_at	Data not found		X
234081_at	Data not found		X
234163_at	ubiquitin protein ligase E3A	UBE3A	X
234578_at	Data not found		X
234723_x_at	Data not found		X
234873_x_at	ribosomal protein L7a	RPL7A
234969_s_at	enhancer of polycomb homolog 1 (Drosophila)	EPC1	X
234981_x_at	carboxymethylenebutenolidase homolog (Pseudomonas)	CMBL	X
234989_at	Data not found		X
234997_x_at	Data not found		X
235049_at	adenylate cyclase 1 (brain)	ADCY1	X
235122_at	human immunodeficiency virus type I enhancer binding protein 3	HIVEP3
235200_at	zinc finger protein 561	ZNF561	X
235213_at	inositol-trisphosphate 3-kinase B	ITPKB
235288_at	Data not found		X
235461_at	tet methylcytosine dioxygenase 2	TET2	X
235482_at	PCBP1 antisense RNA 1	PCBP1-AS1
235562_at	chromosome 3 open reading frame 70	C3orf70	X
235567_at	RAR-related orphan receptor A	RORA	X
235575_at	Data not found		X
235697_at	Data not found		X
235730_at	Data not found		X
235789_at	lysine (K)-specific demethylase 4B	KDM4B	X
235887_at	Data not found		X
235918_x_at	centrosomal protein 97kDa	CEP97
235964_x_at	Data not found		X
236139_at	Data not found		X
236153_at	Data not found
236265_at	Sp4 transcription factor	SP4	X
236268_at	SEC22 vesicle trafficking protein homolog C (S. cerevisiae)	SEC22C	X
236274_at	eukaryotic translation initiation factor 3, subunit B	EIF3B	X
236283_x_at	p21 protein (Cdc42/Rac)-activated kinase 2 pseudogene	LOC646214	X
236338_at	Data not found		X
236368_at	KIAA0368	KIAA0368
236429_at	zinc finger protein 83	ZNF83	X
236484_at	Data not found		X
236488_s_at	Data not found		X
236725_at	WW and C2 domain containing 1	WWC1
236752_at	Data not found		X
236783_at	Kv channel interacting protein 4	KCNIP4	X
236901_at	Data not found		X
236934_at	Data not found		X
236949_at	Data not found		X
237018_at	Data not found		X
237040_at	CWF19-like 2, cell cycle control (S. pombe)	CWF19L2	X
237107_at	In multiple Geneids
237560_at	mitochondrial ribosomal protein S5	MRPS5
237600_at	Data not found		X
237768_x_at	Data not found		X
237798_at	Data not found		X
237937_x_at	Data not found
238009_at	Data not found
238017_at	short chain dehydrogenase/reductase family 16C, member 5	SDR16C5	X
238108_at	Data not found
238115_at	DnaJ (Hsp40) homolog, subfamily C, member 18	DNAJC18	X
238130_at	nuclear factor of activated T-cells, cytoplasmic, calcineurin-dependent 2 interacting protein	NFATC2IP	X
238147_at	tripartite motif containing 46	TRIM46	X
238346_s_at	trimethylguanosine synthase 1	TGS1	X
238470_at	Sys1 golgi trafficking protein	SYS1	X
238525_at	DEAD (Asp-Glu-Ala-Asp) box helicase 56	DD	X
238558_at	Data not found		X
238560_at	calcium binding and coiled-coil domain 2	CALCOCO2	X
238602_at	DIS3 like 3'-5' exoribonuclease 2	DIS3L2	X
238716_at	family with sequence similarity 85, member A	FAM85A	X
238736_at	REV3-like, polymerase (DNA directed), zeta, catalytic subunit	REV3L	X
238761_at	ELK4, ETS-domain protein (SRF accessory protein 1)	ELK4	X
238812_at	Data not found		X
238851_at	ankyrin repeat domain 13A	ANKRD13A	X
238919_at	Data not found		X
239026_x_at	ArfGAP with GTPase domain, ankyrin repeat and PH domain 3	AGAP3	X
239035_at	methylenetetrahydrofolate reductase (NAD(P)H)	MTHFR	X
239096_at	Data not found		X
239102_s_at	Data not found		X
239179_at	Data not found		X
239333_x_at	Data not found		X
239469_at	Data not found		X
239497_at	Data not found		X
239629_at	CASP8 and FADD-like apoptosis regulator	CFLAR	X
239678_at	Data not found		X
239757_at	zinc finger, AN1-type domain 6	ZFAND6	X
239762_at	uncharacterized LOC286437	LOC286437
239831_at	transmembrane protein 106C	TMEM106C	X
240005_at	Data not found		X
240018_at	Data not found		X
240282_at	WD repeat domain 1	WDR1
240331_at	Data not found		X
240532_at	solute carrier family 32 (GABA vesicular transporter), member 1	SLC32A1	X
240554_at	A kinase (PRKA) anchor protein 8-like	AKAP8L	X
240602_at	HBS1-like translational GTPase	HBS1L	X
240758_at	Data not found		X
240948_at	Data not found		X
241216_at	Data not found		X
241389_at	cholinergic receptor, nicotinic, beta 2 (neuronal)	CHRNB2	X
241391_at	Data not found		X
241727_x_at	dihydrofolate reductase-like 1	DHFRL1	X
241741_at	cardiolipin synthase 1	CRLS1	X
241786_at	Data not found		X
241798_at	Data not found		X
241893_at	Data not found		X
241905_at	phosphatidylinositol-4-phosphate 3-kinase, catalytic subunit type 2 alpha	PIK3C2A
241954_at	farnesyl-diphosphate farnesyltransferase 1	FDFT1	X
242136_x_at	C-terminal binding protein 2 pseudogene	MGC70870	X
242195_x_at	numb homolog (Drosophila)-like	NUMBL	X
242239_at	Data not found		X
242240_at	Data not found		X
242319_at	diacylglycerol kinase, gamma 90kDa	DGKG	X
242343_x_at	Data not found		X
242407_at	Data not found		X
242413_at	Data not found		X
242578_x_at	solute carrier family 22 (organic cation transporter), member 3	SLC22A3	X
242688_at	Data not found		X
242712_x_at	In multiple Geneids		X
242829_x_at	F-box and leucine-rich repeat protein 3	FB	X
242837_at	serine/arginine-rich splicing factor 4	SRSF4	X
242973_at	calcium channel, voltage-dependent, L type, alpha 1C subunit	CACNA1C	X
243025_at	Data not found		X
243275_at	Data not found		X
243318_at	DDB1 and CUL4 associated factor 8	DCAF8	X
243329_at	Data not found		X
243442_x_at	Data not found
243459_x_at	Data not found
243525_at	Data not found		X
243561_at	Data not found		X
243593_s_at	Data not found		X
243617_at	zinc finger protein 827	ZNF827	X
243648_at	zinc finger, BED-type containing 6	ZBED6	X
243704_at	Data not found		X
243791_at	Data not found		X
243827_at	Data not found		X
244027_at	Data not found		X
244045_at	Data not found		X
244248_at	tetratricopeptide repeat domain 27	TTC27	X
244511_at	Data not found		X
244610_x_at	Data not found		X
244673_at	Data not found		X
244778_x_at	Data not found		X
244803_at	Data not found		X
244859_at	Data not found		X
31837_at	lipase maturation factor 2	LMF2
31874_at	growth arrest-specific 2 like 1	GAS2L1	X
32069_at	NEDD4 binding protein 1	N4BP1	X
33148_at	zinc finger RNA binding protein	ZFR	X
35436_at	golgin A2	GOLGA2	X
35666_at	sema domain, immunoglobulin domain (Ig), short basic domain, secreted, (semaphorin) 3F	SEMA3F
36129_at	small G protein signaling modulator 2	SGSM2	X
36711_at	v-maf avian musculoaponeurotic fibrosarcoma oncogene homolog F	MAFF	X
37012_at	capping protein (actin filament) muscle Z-line, beta	CAPZB	X
37996_s_at	dystrophia myotonica-protein kinase	DMPK	X
38069_at	chloride channel, voltage-sensitive 7	CLCN7
38710_at	OTU deubiquitinase, ubiquitin aldehyde binding 1	OTUB1	X
40569_at	myeloid zinc finger 1	MZF1	X
41220_at	septin 9	SEPT9	X
43427_at	acetyl-CoA carboxylase beta	ACACB	X
43544_at	mediator complex subunit 16	MED16	X
46665_at	sema domain, immunoglobulin domain (Ig), transmembrane domain (TM) and short cytoplasmic domain, (semaphorin) 4C	SEMA4C	X
49077_at	protein phosphatase methylesterase 1	PPME1	X
49452_at	acetyl-CoA carboxylase beta	ACACB	X
51774_s_at	hypothetical protein LOC222070	LOC222070	X
57532_at	dishevelled segment polarity protein 2	DVL2
63825_at	abhydrolase domain containing 2	ABHD2	X
81811_at	Data not found		X

## Sheet: GABk
Probe	Gene Name	Symbol	Common with CABk
1316_at	thyroid hormone receptor, alpha	THRA	X
1552362_a_at	liver expressed antimicrobial peptide 2	LEAP2
1552507_at	potassium channel, voltage gated subfamily E regulatory beta subunit 4	KCNE4	X
1552510_at	solute carrier family 34 (type II sodium/phosphate cotransporter), member 3	SLC34A3
1553186_x_at	RAS and EF-hand domain containing	RASEF	X
1553274_a_at	small nuclear ribonucleoprotein 48kDa (U11/U12)	SNRNP48
1553313_s_at	solute carrier family 5 (sodium/myo-inositol cotransporter), member 3	SLC5A3
1553693_s_at	carbonyl reductase 4	CBR4	X
1553984_s_at	deoxythymidylate kinase (thymidylate kinase)	DTYMK
1554593_s_at	solute carrier family 1 (high affinity aspartate/glutamate transporter), member 6	SLC1A6	X
1555495_a_at	CWC27 spliceosome-associated protein homolog (S. cerevisiae)	CWC27	X
1556069_s_at	hypoxia inducible factor 3, alpha subunit	HIF3A
1556336_at	RNA binding motif protein,
1556690_s_at	Data not found		X
1556813_at	Data not found
1557155_a_at	Data not found		X
1557293_at	long intergenic non-protein coding RNA 969	LINC00969	X
1557452_at	Data not found
1557895_at	FLJ35934	FLJ35934	X
1558279_a_at	3-ketodihydrosphingosine reductase	KDSR	X
1558678_s_at	metastasis associated lung adenocarcinoma transcript 1 (non-protein coding)	MALAT1	X
1558692_at	glycosylated lysosomal membrane protein	GLMP
1558695_at	Data not found		X
1558733_at	zinc finger and BTB domain containing 38	ZBTB38
1558792_x_at	adaptor-related protein complex 2, alpha 1 subunit	AP2A1	X
1558831_x_at	Data not found		X
1559060_a_at	folliculin interacting protein 1	FNIP1	X
1559391_s_at	Data not found		X
1559402_a_at	chromosome 1 open reading frame 61	C1orf61
1559949_at	Data not found		X
1560116_a_at	neural precursor cell expressed, developmentally down-regulated 1	NEDD1	X
1560689_s_at	v-akt murine thymoma viral oncogene homolog 2	AKT2	X
1560741_at	small nuclear ribonucleoprotein polypeptide N	SNRPN	X
1561158_at	Data not found		X
1561167_at	Data not found
1561346_at	Data not found		X
1561657_at	Data not found		X
1561686_at	Data not found		X
1562280_at	Data not found		X
1562416_at	Data not found		X
1562650_at	FRY-like	FRYL
1562898_at	Data not found		X
1563130_a_at	Data not found
1563482_at	Data not found
1563781_at	hypothetical protein LOC285949	LOC285949	X
1563881_at	Data not found		X
1565620_at	ArfGAP with GTPase domain, ankyrin repeat and PH domain 4	AGAP4	X
1566480_x_at	chromosome 17 open reading frame 104	C17orf104	X
1566848_x_at	Data not found
1566887_x_at	Data not found
1568603_at	Ca++-dependent secretion activator	CADPS	X
1568612_at	gamma-aminobutyric acid (GABA) A receptor, gamma 2	GABRG2	X
1568763_s_at	In multiple Geneids		X
1568877_a_at	acyl-CoA binding domain containing 5	ACBD5	X
1568986_x_at	phosphatidylinositol glycan anchor biosynthesis, class T	PIGT
1569069_s_at	tudor domain containing 3	TDRD3
1569200_at	Data not found		X
1569302_at	centrosomal protein 295kDa	CEP295	X
1569482_at	Data not found		X
1569661_at	neuronal PAS domain protein 3	NPAS3	X
1570210_x_at	protein phosphatase 6, regulatory subunit 2	PPP6R2	X
200001_at	calpain, small subunit 1	CAPNS1
200039_s_at	proteasome (prosome, macropain) subunit, beta type, 2	PSMB2	X
200042_at	RNA 2',3'-cyclic phosphate and 5'-OH ligase	RTCB	X
200047_s_at	YY1 transcription factor	YY1	X
200053_at	sperm associated antigen 7	SPAG7	X
200072_s_at	heterogeneous nuclear ribonucleoprotein M	HNRNPM	X
200078_s_at	ATPase, H+ transporting, lysosomal 21kDa, V0 subunit b	ATP6V0B
200085_s_at	transcription elongation factor B (SIII), polypeptide 2 (18kDa, elongin B)	TCEB2	X
200098_s_at	anaphase promoting complex subunit 5	ANAPC5	X
200625_s_at	CAP, adenylate cyclase-associated protein 1 (yeast)	CAP1	X
200639_s_at	tyrosine 3-monooxygenase/tryptophan 5-monooxygenase activation protein, zeta	YWHAZ	X
200640_at	tyrosine 3-monooxygenase/tryptophan 5-monooxygenase activation protein, zeta	YWHAZ	X
200647_x_at	In multiple Geneids
200658_s_at	prohibitin	PHB
200685_at	serine/arginine-rich splicing factor 11	SRSF11	X
200693_at	tyrosine 3-monooxygenase/tryptophan 5-monooxygenase activation protein, theta	YWHAQ	X
200705_s_at	eukaryotic translation elongation factor 1 beta 2	EEF1B2
200708_at	glutamic-oxaloacetic transaminase 2, mitochondrial	GOT2	X
200732_s_at	protein tyrosine phosphatase type IVA, member 1	PTP4A1	X
200754_x_at	serine/arginine-rich splicing factor 2	SRSF2	X
200771_at	laminin, gamma 1 (formerly LAMB2)	LAMC1	X
200775_s_at	heterogeneous nuclear ribonucleoprotein K	HNRNPK	X
200813_s_at	platelet-activating factor acetylhydrolase 1b, regulatory subunit 1 (45kDa)	PAFAH1B1
200822_x_at	triosephosphate isomerase 1	TPI1	X
200843_s_at	glutamyl-prolyl-tRNA synthetase	EPRS
200883_at	ubiquinol-cytochrome c reductase core protein II	UQCRC2
200954_at	ATPase, H+ transporting, lysosomal 16kDa, V0 subunit c	ATP6V0C	X
200976_s_at	Tax1 (human T-cell leukemia virus type I) binding protein 1	TA	X
200980_s_at	pyruvate dehydrogenase (lipoamide) alpha 1	PDHA1	X
201057_s_at	golgin B1	GOLGB1	X
201065_s_at	In multiple Geneids		X
201067_at	proteasome (prosome, macropain) 26S subunit, ATPase, 2	PSMC2	X
201083_s_at	BCL2-associated transcription factor 1	BCLAF1	X
201145_at	HCLS1 associated protein		X
201146_at	nuclear factor, erythroid 2-like 2	NFE2L2	X
201182_s_at	chromodomain helicase DNA binding protein 4	CHD4	X
201217_x_at	ribosomal protein L3	RPL3	X
201272_at	aldo-keto reductase family 1, member B1 (aldose reductase)	AKR1B1
201290_at	SEC11 homolog A (S. cerevisiae)	SEC11A	X
201305_x_at	acidic (leucine-rich) nuclear phosphoprotein 32 family, member B	ANP32B	X
201322_at	ATP synthase, H+ transporting, mitochondrial F1 complex, beta polypeptide	ATP5B
201324_at	epithelial membrane protein 1	EMP1	X
201371_s_at	cullin 3	CUL3	X
201391_at	TNF receptor-associated protein 1	TRAP1
201400_at	proteasome (prosome, macropain) subunit, beta type, 3	PSMB3	X
201410_at	pleckstrin homology domain containing, family B (evectins) member 2	PLEKHB2	X
201415_at	glutathione synthetase	GSS	X
201434_at	tetratricopeptide repeat domain 1	TTC1	X
201441_at	cytochrome c oxidase subunit VIb polypeptide 1 (ubiquitous)	CO	X
201500_s_at	protein phosphatase 1, regulatory (inhibitor) subunit 11	PPP1R11	X
201502_s_at	nuclear factor of kappa light polypeptide gene enhancer in B-cells inhibitor, alpha	NFKBIA
201509_at	isocitrate dehydrogenase 3 (NAD+) beta	IDH3B	X
201527_at	ATPase, H+ transporting, lysosomal 14kDa, V1 subunit F	ATP6V1F	X
201548_s_at	lysine (K)-specific demethylase 5B	KDM5B	X
201570_at	SAMM50 sorting and assembly machinery component	SAMM50	X
201586_s_at	splicing factor proline/glutamine-rich	SFPQ	X
201622_at	staphylococcal nuclease and tudor domain containing 1	SND1	X
201628_s_at	Ras-related GTP binding A	RRAGA
201632_at	eukaryotic translation initiation factor 2B, subunit 1 alpha, 26kDa	EIF2B1
201636_at	fragile		X
201704_at	ectonucleoside triphosphate diphosphohydrolase 6 (putative)	ENTPD6	X
201709_s_at	nipsnap homolog 1 (C. elegans)	NIPSNAP1	X
201810_s_at	SH3-domain binding protein 5 (BTK-associated)	SH3BP5	X
201825_s_at	saccharopine dehydrogenase (putative)	SCCPDH
201828_x_at	family with sequence similarity 127, member A	FAM127A	X
201836_s_at	suppressor of Ty 7 (S. cerevisiae)-like	SUPT7L	X
201892_s_at	IMP (inosine 5'-monophosphate) dehydrogenase 2	IMPDH2
201991_s_at	kinesin family member 5B	KIF5B	X
202025_x_at	acetyl-CoA acyltransferase 1	ACAA1	X
202070_s_at	isocitrate dehydrogenase 3 (NAD+) alpha	IDH3A	X
202120_x_at	adaptor-related protein complex 2, sigma 1 subunit	AP2S1	X
202121_s_at	charged multivesicular body protein 2A	CHMP2A	X
202135_s_at	ARP1 actin-related protein 1 homolog B, centractin beta (yeast)	ACTR1B	X
202138_x_at	aminoacyl tRNA synthetase complex-interacting multifunctional protein 2	AIMP2	X
202144_s_at	adenylosuccinate lyase	ADSL	X
202160_at	CREB binding protein	CREBBP	X
202178_at	protein kinase C, zeta	PRKCZ	X
202201_at	biliverdin reductase B	BLVRB	X
202330_s_at	uracil-DNA glycosylase	UNG	X
202360_at	mastermind-like 1 (Drosophila)	MAML1	X
202505_at	small nuclear ribonucleoprotein polypeptide B	SNRPB2	X
202534_x_at	dihydrofolate reductase	DHFR	X
202551_s_at	cysteine rich transmembrane BMP regulator 1 (chordin-like)	CRIM1	X
202594_at	leptin receptor overlapping transcript-like 1	LEPROTL1	X
202644_s_at	tumor necrosis factor, alpha-induced protein 3	TNFAIP3
202712_s_at	In multiple Geneids		X
202717_s_at	cell division cycle 16	CDC16	X
202773_s_at	splicing factor, suppressor of white-apricot family	SFSWAP
202820_at	aryl hydrocarbon receptor	AHR	X
202829_s_at	vesicle-associated membrane protein 7	VAMP7	X
202858_at	U2 small nuclear RNA auxiliary factor 1	U2AF1	X
202868_s_at	processing of precursor 4, ribonuclease P/MRP subunit (S. cerevisiae)	POP4	X
202927_at	peptidylprolyl cis/trans isomerase, NIMA-interacting 1	PIN1	X
202961_s_at	ATP synthase, H+ transporting, mitochondrial Fo complex, subunit F2	ATP5J2	X
202974_at	membrane protein, palmitoylated 1, 55kDa	MPP1	X
203031_s_at	uroporphyrinogen III synthase	UROS	X
203068_at	kelch-like family member 21	KLHL21	X
203082_at	BMS1 ribosome biogenesis factor	BMS1	X
203113_s_at	eukaryotic translation elongation factor 1 delta (guanine nucleotide exchange protein)	EEF1D	X
203122_at	trafficking protein particle complex 12	TRAPPC12	X
203132_at	retinoblastoma 1	RB1	X
203140_at	B-cell CLL/lymphoma 6	BCL6	X
203146_s_at	gamma-aminobutyric acid (GABA) B receptor, 1	GABBR1	X
203173_s_at	chromosome 16 open reading frame 62	C16orf62
203238_s_at	notch 3	NOTCH3
203264_s_at	Cdc42 guanine nucleotide exchange factor (GEF) 9	ARHGEF9
203297_s_at	jumonji, AT rich interactive domain 2	JARID2	X
203329_at	protein tyrosine phosphatase, receptor type, M	PTPRM
203431_s_at	Rho GTPase activating protein 32	ARHGAP32	X
203466_at	MpV17 mitochondrial inner membrane protein	MPV17	X
203485_at	reticulon 1	RTN1	X
203509_at	sortilin-related receptor, L(DLR class) A repeats containing	SORL1	X
203518_at	lysosomal trafficking regulator	LYST
203549_s_at	lipoprotein lipase	LPL	X
203606_at	NADH dehydrogenase (ubiquinone) Fe-S protein 6, 13kDa (NADH-coenzyme Q reductase)	NDUFS6	X
203656_at	FIG4 phosphoinositide 5-phosphatase	FIG4
203752_s_at	jun D proto-oncogene	JUND	X
203773_x_at	biliverdin reductase A	BLVRA	X
203798_s_at	visinin-like 1	VSNL1
203814_s_at	NAD(P)H dehydrogenase, quinone 2	NQO2	X
203849_s_at	kinesin family member 1A	KIF1A	X
203861_s_at	actinin, alpha 2	ACTN2
203909_at	solute carrier family 9, subfamily A (NHE6, cation proton antiporter 6), member 6	SLC9A6	X
203911_at	RAP1 GTPase activating protein	RAP1GAP	X
203956_at	MORC family CW-type zinc finger 2	MORC2	X
204081_at	neurogranin (protein kinase C substrate, RC3)	NRGN
204206_at	MA
204229_at	solute carrier family 17 (vesicular glutamate transporter), member 7	SLC17A7	X
204266_s_at	choline kinase alpha	CHKA	X
204270_at	SKI proto-oncogene	SKI	X
204321_at	neogenin 1	NEO1	X
204466_s_at	synuclein, alpha (non A4 component of amyloid precursor)	SNCA	X
204481_at	bromodomain and PHD finger containing, 1	BRPF1	X
204517_at	peptidylprolyl isomerase C (cyclophilin C)	PPIC	X
204528_s_at	nucleosome assembly protein 1-like 1	NAP1L1	X
204552_at	inositol polyphosphate-4-phosphatase, type I, 107kDa	INPP4A	X
204559_s_at	LSM7 homolog, U6 small nuclear RNA associated (S. cerevisiae)	LSM7	X
204584_at	L1 cell adhesion molecule	L1CAM	X
204622_x_at	nuclear receptor subfamily 4, group A, member 2	NR4A2	X
204663_at	malic enzyme 3, NADP(+)-dependent, mitochondrial	ME3	X
204680_s_at	Rap guanine nucleotide exchange factor (GEF) 5	RAPGEF5	X
204685_s_at	ATPase, Ca++ transporting, plasma membrane 2	ATP2B2
204690_at	syntaxin 8	ST
204718_at	EPH receptor B6	EPHB6	X
204720_s_at	DnaJ (Hsp40) homolog, subfamily C, member 6	DNAJC6	X
204731_at	transforming growth factor, beta receptor III	TGFBR3	X
204786_s_at	interferon (alpha, beta and omega) receptor 2	IFNAR2	X
204957_at	origin recognition complex, subunit 5	ORC5	X
204977_at	DEAD (Asp-Glu-Ala-Asp) box polypeptide 10	DD	X
205117_at	fibroblast growth factor 1 (acidic)	FGF1	X
205257_s_at	amphiphysin	AMPH	X
205353_s_at	phosphatidylethanolamine binding protein 1	PEBP1	X
205514_at	zinc finger protein 415	ZNF415	X
205559_s_at	proprotein convertase subtilisin/kexin type 5	PCSK5	X
205570_at	phosphatidylinositol-5-phosphate 4-kinase, type II, alpha	PIP4K2A	X
205594_at	zinc finger protein 652	ZNF652	X
205751_at	SH3-domain GRB2-like 2	SH3GL2	X
205787_x_at	zinc finger CCCH-type containing 11A	ZC3H11A	X
205816_at	integrin, beta 8	ITGB8	X
205871_at	In multiple Geneids
205967_at	histone cluster 1, H4c	HIST1H4C	X
206122_at	SRY (sex determining region Y)-box 15	SO	X
206137_at	regulating synaptic membrane exocytosis 2	RIMS2
206140_at	LIM homeobox 2	LH	X
206273_at	slowmo homolog 1 (Drosophila)	SLMO1	X
206307_s_at	forkhead box D1	FO	X
206547_s_at	protein phosphatase, EF-hand calcium binding domain 1	PPEF1	X
206562_s_at	casein kinase 1, alpha 1	CSNK1A1	X
206652_at	zinc finger, MYM-type 5	ZMYM5	X
207081_s_at	phosphatidylinositol 4-kinase, catalytic, alpha	PI4KA	X
207084_at	POU class 3 homeobox 2	POU3F2	X
207132_x_at	prefoldin subunit 5	PFDN5	X
207168_s_at	H2A histone family, member Y	H2AFY
207598_x_at			X
207789_s_at	dipeptidyl-peptidase 6	DPP6	X
207966_s_at	golgi glycoprotein 1	GLG1	X
208549_x_at	prothymosin, alpha	PTMA	X
208611_s_at	spectrin, alpha, non-erythrocytic 1	SPTAN1	X
208678_at	ATPase, H+ transporting, lysosomal 31kDa, V1 subunit E1	ATP6V1E1
208682_s_at	melanoma antigen family D2	MAGED2
208704_x_at	amyloid beta (A4) precursor-like protein 2	APLP2	X
208710_s_at	adaptor-related protein complex 3, delta 1 subunit	AP3D1	X
208732_at	RAB2A, member RAS oncogene family	RAB2A	X
208835_s_at	LUC7-like 3 (S. cerevisiae)	LUC7L3	X
208851_s_at	Thy-1 cell surface antigen	THY1
208859_s_at	alpha thalassemia/mental retardation syndrome		X
208936_x_at	lectin, galactoside-binding, soluble, 8	LGALS8	X
208942_s_at	SEC62 homolog (S. cerevisiae)	SEC62	X
208955_at	deoxyuridine triphosphatase	DUT	X
208969_at	NADH dehydrogenase (ubiquinone) 1 alpha subcomplex, 9, 39kDa	NDUFA9	X
208972_s_at	ATP synthase, H+ transporting, mitochondrial Fo complex, subunit C1 (subunit 9)	ATP5G1	X
208988_at	lysine (K)-specific demethylase 2A	KDM2A
208996_s_at	polymerase (RNA) II (DNA directed) polypeptide C, 33kDa	POLR2C	X
209001_s_at	anaphase promoting complex subunit 13	ANAPC13	X
209023_s_at	stromal antigen 2	STAG2	X
209058_at	endothelial differentiation-related factor 1	EDF1
209066_x_at	ubiquinol-cytochrome c reductase binding protein	UQCRB	X
209079_x_at	In multiple Geneids		X
209104_s_at	NHP2 ribonucleoprotein	NHP2
209163_at	cytochrome b561	CYB561	X
209164_s_at	cytochrome b561	CYB561	X
209169_at	glycoprotein M6B	GPM6B	X
209177_at	NADH dehydrogenase (ubiquinone) complex I, assembly factor 3	NDUFAF3	X
209194_at	centrin, EF-hand protein, 2	CETN2
209225_x_at	transportin 1	TNPO1	X
209249_s_at	growth hormone inducible transmembrane protein	GHITM
209250_at	delta(4)-desaturase, sphingolipid 1	DEGS1	X
209251_x_at	tubulin, alpha 1c	TUBA1C	X
209258_s_at	structural maintenance of chromosomes 3	SMC3	X
209265_s_at	methyltransferase like 3	METTL3
209268_at	vacuolar protein sorting 45 homolog (S. cerevisiae)	VPS45	X
209289_at	nuclear factor I/B	NFIB	X
209316_s_at	HBS1-like translational GTPase	HBS1L	X
209343_at	EF-hand domain family, member D1	EFHD1	X
209348_s_at	v-maf avian musculoaponeurotic fibrosarcoma oncogene homolog	MAF
209409_at	growth factor receptor-bound protein 10	GRB10	X
209440_at	phosphoribosyl pyrophosphate synthetase 1	PRPS1	X
209459_s_at	4-aminobutyrate aminotransferase	ABAT
209534_x_at	A kinase (PRKA) anchor protein 13	AKAP13	X
209553_at	vacuolar protein sorting 8 homolog (S. cerevisiae)	VPS8	X
209558_s_at	In multiple Geneids		X
209583_s_at	CD200 molecule	CD200	X
209586_s_at	prune exopolyphosphatase	PRUNE	X
209609_s_at	mitochondrial ribosomal protein L9	MRPL9	X
209686_at	S100 calcium binding protein B	S100B	X
209715_at	chromobox homolog 5	CB	X
209751_s_at	In multiple Geneids		X
209890_at	tetraspanin 5	TSPAN5
209956_s_at	calcium/calmodulin-dependent protein kinase II beta	CAMK2B
209991_x_at	gamma-aminobutyric acid (GABA) B receptor, 2	GABBR2	X
210111_s_at	PNAS-119	LOC100287552	X
210268_at	nuclear transcription factor,		X
210574_s_at	nudC nuclear distribution protein	NUDC
210679_x_at	Data not found		X
210686_x_at	solute carrier family 25 (mitochondrial carrier), member 16	SLC25A16	X
210701_at	craniofacial development protein 1	CFDP1	X
210825_s_at	phosphatidylethanolamine binding protein 1	PEBP1	X
210840_s_at	IQ motif containing GTPase activating protein 1	IQGAP1	X
210908_s_at	prefoldin subunit 5	PFDN5	X
210976_s_at	phosphofructokinase, muscle	PFKM	X
211386_at	uncharacterized protein MGC12488	MGC12488	X
211464_x_at	caspase 6, apoptosis-related cysteine peptidase	CASP6	X
211493_x_at	dystrobrevin, alpha	DTNA
211616_s_at	5-hydroxytryptamine (serotonin) receptor 2A, G protein-coupled	HTR2A	X
211752_s_at	NADH dehydrogenase (ubiquinone) Fe-S protein 7, 20kDa (NADH-coenzyme Q reductase)	NDUFS7	X
211779_x_at	adaptor-related protein complex 2, alpha 2 subunit	AP2A2	X
211921_x_at	prothymosin, alpha	PTMA	X
211930_at	heterogeneous nuclear ribonucleoprotein A3	HNRNPA3	X
211964_at	collagen, type IV, alpha 2	COL4A2	X
211993_at	WNK lysine deficient protein kinase 1	WNK1	X
212088_at	peptidase (mitochondrial processing) alpha	PMPCA	X
212095_s_at	microtubule associated tumor suppressor 1	MTUS1	X
212104_s_at	RNA binding protein, fox-1 homolog (C. elegans) 2	RBFO	X
212114_at	ataxin 7-like 3B	AT	X
212177_at	PNN-interacting serine/arginine-rich protein	PNISR	X
212178_s_at	In multiple Geneids		X
212207_at	mediator complex subunit 13-like	MED13L	X
212209_at	mediator complex subunit 13-like	MED13L	X
212228_s_at	coenzyme Q9	COQ9	X
212252_at	calcium/calmodulin-dependent protein kinase kinase 2, beta	CAMKK2	X
212265_at	QKI, KH domain containing, RNA binding	QKI	X
212281_s_at	transmembrane protein 97	TMEM97
212296_at	proteasome (prosome, macropain) 26S subunit, non-ATPase, 14	PSMD14	X
212322_at	sphingosine-1-phosphate lyase 1	SGPL1	X
212348_s_at	lysine (K)-specific demethylase 1A	KDM1A	X
212372_at	myosin, heavy chain 10, non-muscle	MYH10	X
212384_at	DEAD (Asp-Glu-Ala-Asp) box polypeptide 39B	DD	X
212432_at	GrpE-like 1, mitochondrial (E. coli)	GRPEL1	X
212450_at	SECIS binding protein 2-like	SECISBP2L	X
212451_at	SECIS binding protein 2-like	SECISBP2L	X
212462_at	K(lysine) acetyltransferase 6B	KAT6B	X
212468_at	sperm associated antigen 9	SPAG9	X
212483_at	Nipped-B homolog (Drosophila)	NIPBL	X
212491_s_at	DnaJ (Hsp40) homolog, subfamily C, member 8	DNAJC8	X
212501_at	CCAAT/enhancer binding protein (C/EBP), beta	CEBPB	X
212506_at	phosphatidylinositol binding clathrin assembly protein	PICALM	X
212581_x_at	glyceraldehyde-3-phosphate dehydrogenase	GAPDH	X
212645_x_at	brain and reproductive organ-expressed (TNFRSF1A modulator)	BRE	X
212652_s_at	sorting nexin 4	SN	X
212673_at	methionyl aminopeptidase 1	METAP1	X
212699_at	secretory carrier membrane protein 5	SCAMP5
212701_at	talin 2	TLN2
212716_s_at	eukaryotic translation initiation factor 3, subunit K	EIF3K
212832_s_at	cytoskeleton associated protein 5	CKAP5	X
212896_at	superkiller viralicidic activity 2-like 2 (S. cerevisiae)	SKIV2L2	X
212992_at	AHNAK nucleoprotein 2	AHNAK2	X
212995_x_at	mitotic spindle organizing protein 2B	MZT2B	X
213015_at	bobby sox homolog (Drosophila)	BB	X
213039_at	Rho/Rac guanine nucleotide exchange factor (GEF) 18	ARHGEF18	X
213079_at	TSR2, 20S rRNA accumulation, homolog (S. cerevisiae)	TSR2	X
213089_at	uncharacterized LOC100272216	LOC100272216	X
213093_at	protein kinase C, alpha	PRKCA	X
213195_at	LYR motif containing 9	LYRM9	X
213298_at	nuclear factor I/C (CCAAT-binding transcription factor)	NFIC	X
213421_x_at	protease, serine, 3	PRSS3	X
213428_s_at	collagen, type VI, alpha 1	COL6A1
213453_x_at	glyceraldehyde-3-phosphate dehydrogenase	GAPDH	X
213457_at	malignant fibrous histiocytoma amplified sequence 1	MFHAS1	X
213517_at	poly(rC) binding protein 2	PCBP2	X
213535_s_at	ubiquitin-conjugating enzyme E2I	UBE2I	X
213545_x_at	sorting nexin 3	SN	X
213693_s_at	mucin 1, cell surface associated	MUC1	X
213710_s_at	calmodulin 1 (phosphorylase kinase, delta)	CALM1	X
213735_s_at	cytochrome c oxidase subunit Vb	CO
213744_at	attractin-like 1	ATRNL1	X
213808_at	Data not found		X
213921_at	somatostatin	SST
214043_at	protein tyrosine phosphatase, receptor type, D	PTPRD	X
214246_x_at	misshapen-like kinase 1	MINK1	X
214375_at	In multiple Geneids		X
214394_x_at	eukaryotic translation elongation factor 1 delta (guanine nucleotide exchange protein)	EEF1D	X
214436_at	F-box and leucine-rich repeat protein 2	FB	X
214499_s_at	BCL2-associated transcription factor 1	BCLAF1	X
214594_x_at	ATPase, aminophospholipid transporter, class I, type 8B, member 1	ATP8B1	X
214623_at	F-box and WD repeat domain containing 4 pseudogene 1	FB	X
214707_x_at	Alstrom syndrome protein 1	ALMS1	X
214743_at	cut-like homeobox 1	CU	X
214799_at	neurofascin	NFASC	X
214823_at	zinc finger protein 204, pseudogene	ZNF204P	X
214850_at	glucuronidase, beta pseudogene	LOC100170939	X
214925_s_at	spectrin, alpha, non-erythrocytic 1	SPTAN1
214934_at	ATPase, class II, type 9B	ATP9B	X
215021_s_at	neurexin 3	NR	X
215091_s_at	general transcription factor IIIA	GTF3A	X
215167_at	mediator complex subunit 14	MED14	X
215269_at	trafficking protein particle complex 10	TRAPPC10
215280_s_at	protein tyrosine phosphatase, receptor type, f polypeptide (PTPRF), interacting protein (liprin), alpha 3	PPFIA3	X
215306_at	Data not found		X
215383_x_at	spastic paraplegia 21 (autosomal recessive, Mast syndrome)	SPG21	X
215385_at	Data not found		X
215493_x_at	butyrophilin, subfamily 2, member A1	BTN2A1	X
215499_at	mitogen-activated protein kinase kinase 3	MAP2K3
215504_x_at	Data not found		X
215514_at	Data not found		X
215543_s_at	like-glycosyltransferase	LARGE	X
215553_x_at	Data not found		X
215600_x_at	F-box and WD repeat domain containing 12	FB	X
215698_at	lysine (K)-specific demethylase 5A	KDM5A	X
215785_s_at	cytoplasmic FMR1 interacting protein 2	CYFIP2
215889_at	SKI-like proto-oncogene	SKIL	X
215963_x_at	In multiple Geneids		X
216101_at	Data not found		X
216308_x_at	glyoxylate reductase/hydroxypyruvate reductase	GRHPR	X
216524_x_at	Data not found		X
216527_at	Data not found		X
216550_x_at	ankyrin repeat domain 12	ANKRD12	X
216745_x_at	Data not found		X
217028_at	chemokine (C-		X
217077_s_at	gamma-aminobutyric acid (GABA) B receptor, 2	GABBR2	X
217250_s_at	chromodomain helicase DNA binding protein 5	CHD5	X
217398_x_at	glyceraldehyde-3-phosphate dehydrogenase	GAPDH	X
217482_at	Data not found		X
217520_x_at	similar to hCG2006901	LOC100288671
217554_at	Data not found
217713_x_at	Data not found		X
217717_s_at	tyrosine 3-monooxygenase/tryptophan 5-monooxygenase activation protein, beta	YWHAB
217726_at	coatomer protein complex, subunit zeta 1	COPZ1	X
217761_at	acireductone dioxygenase 1	ADI1	X
217819_at	golgin A7	GOLGA7	X
217860_at	In multiple Geneids		X
217871_s_at	macrophage migration inhibitory factor (glycosylation-inhibiting factor)	MIF	X
217904_s_at	beta-site APP-cleaving enzyme 1	BACE1	X
217927_at	signal peptidase complex subunit 1 homolog (S. cerevisiae)	SPCS1	X
217937_s_at	histone deacetylase 7	HDAC7	X
217939_s_at	aftiphilin	AFTPH	X
217946_s_at	SUMO1 activating enzyme subunit 1	SAE1	X
217969_at	vacuolar protein sorting 51 homolog (S. cerevisiae)	VPS51	X
217985_s_at	bromodomain adjacent to zinc finger domain, 1A	BAZ1A
218026_at	cytochrome c oxidase assembly factor 3	COA3	X
218048_at	COMM domain containing 3	COMMD3	X
218072_at	COMM domain containing 9	COMMD9
218220_at	chromosome 12 open reading frame 10	C12orf10
218247_s_at	mex-3 RNA binding family member C	ME	X
218271_s_at	presenilin associated, rhomboid-like	PARL	X
218298_s_at	chromosome 14 open reading frame 159	C14orf159	X
218302_at	presenilin enhancer gamma secretase subunit	PSENEN	X
218310_at	RAB guanine nucleotide exchange factor (GEF) 1	RABGEF1
218330_s_at	neuron navigator 2	NAV2	X
218381_s_at	U2 small nuclear RNA auxiliary factor 2	U2AF2	X
218520_at	TANK-binding kinase 1	TBK1	X
218522_s_at	microtubule-associated protein 1S	MAP1S	X
218543_s_at	poly (ADP-ribose) polymerase family, member 12	PARP12	X
218625_at	neuritin 1	NRN1
218671_s_at	ATPase inhibitory factor 1	ATPIF1
218843_at	fibronectin type III domain containing 4	FNDC4	X
218865_at	mitochondrial amidoxime reducing component 1	2001-03-01	X
218953_s_at	prenylcysteine oxidase 1 like	PCYO	X
219019_at	p53-induced death domain protein 1	PIDD1	X
219028_at	homeodomain interacting protein kinase 2	HIPK2	X
219032_x_at	opsin 3	OPN3	X
219204_s_at	serine racemase	SRR	X
219387_at	coiled-coil domain containing 88A	CCDC88A	X
219389_at	sushi domain containing 4	SUSD4	X
219670_at	BEN domain containing 5	BEND5	X
219671_at	hippocalcin like 4	HPCAL4	X
219709_x_at	family with sequence similarity 173, member A	FAM173A	X
219961_s_at	kizuna centrosomal protein	KIZ	X
220071_x_at	HAUS augmin-like complex, subunit 2	HAUS2	X
220072_at	centrosome and spindle pole associated protein 1	CSPP1	X
220081_x_at	hydroxysteroid (17-beta) dehydrogenase 7	HSD17B7	X
220136_s_at	crystallin, beta A2	CRYBA2	X
220269_at	zinc finger, B-box domain containing	ZBB	X
220295_x_at	DEP domain containing 1	DEPDC1	X
220316_at	neuronal PAS domain protein 3	NPAS3	X
220411_x_at	podocan-like 1	PODNL1
220539_at	cilia and flagella associated protein 46	CFAP46
220609_at	SUMO-interacting motifs containing 1 pseudogene	LOC202181	X
220615_s_at	fatty acyl CoA reductase 2	FAR2	X
220942_x_at	family with sequence similarity 162, member A	FAM162A	X
220966_x_at	actin related protein 2/3 complex, subunit 5-like	ARPC5L	X
221263_s_at	splicing factor 3b, subunit 5, 10kDa	SF3B5
221476_s_at	ribosomal protein L15	RPL15	X
221486_at	endosulfine alpha	ENSA	X
221488_s_at	cutA divalent cation tolerance homolog (E. coli)	CUTA	X
221497_x_at	egl-9 family hypoxia-inducible factor 1	EGLN1	X
221506_s_at	transportin 2	TNPO2	X
221772_s_at	protein phosphatase 2, regulatory subunit B, delta	PPP2R2D	X
221853_s_at	In multiple Geneids		X
221864_at	ORAI calcium release-activated calcium modulator 3	ORAI3	X
221877_at	immunity-related GTPase family, Q	IRGQ	X
221886_at	DENN/MADD domain containing 2A	DENND2A	X
221942_s_at	guanylate cyclase 1, soluble, alpha 3	GUCY1A3	X
221952_x_at	tRNA methyltransferase 5	TRMT5	X
222005_s_at	guanine nucleotide binding protein (G protein), gamma 3	GNG3
222024_s_at	A kinase (PRKA) anchor protein 13	AKAP13	X
222043_at	clusterin	CLU	X
222047_s_at	serrate, RNA effector molecule	SRRT	X
222154_s_at	spermatogenesis associated, serine-rich 2-like	SPATS2L	X
222160_at	A kinase (PRKA) anchor protein 8-like	AKAP8L	X
222282_at	Data not found
222284_at	Data not found		X
222313_at	Data not found
222364_at	solute carrier family 44 (choline transporter), member 1	SLC44A1	X
222379_at	potassium channel, voltage gated subfamily E regulatory beta subunit 4	KCNE4
222380_s_at	programmed cell death 6	PDCD6	X
222395_s_at	ubiquitin-conjugating enzyme E2Z	UBE2Z	X
222428_s_at	leucyl-tRNA synthetase	LARS	X
222439_s_at	thyroid hormone receptor associated protein 3	THRAP3	X
222457_s_at	LIM domain and actin binding 1	LIMA1	X
222513_s_at	sorbin and SH3 domain containing 1	SORBS1	X
222610_s_at	S100P binding protein	S100PBP	X
222620_s_at	DnaJ (Hsp40) homolog, subfamily C, member 1	DNAJC1
222621_at	DnaJ (Hsp40) homolog, subfamily C, member 1	DNAJC1
222651_s_at	trichorhinophalangeal syndrome I	TRPS1	X
222725_s_at	palmdelphin	PALMD
222745_s_at	katanin p80 subunit B-like 1	KATNBL1	X
222809_x_at	coiled-coil domain containing 85C	CCDC85C	X
222982_x_at	solute carrier family 38, member 2	SLC38A2	X
222993_at	mitochondrial ribosomal protein L37	MRPL37
223024_at	adaptor-related protein complex 1, mu 1 subunit	AP1M1	X
223035_s_at	phenylalanyl-tRNA synthetase, beta subunit	FARSB	X
223037_at	PDZ domain containing 11	PDZD11	X
223134_at	bobby sox homolog (Drosophila)	BB	X
223185_s_at	basic helix-loop-helix family, member e41	BHLHE41	X
223319_at	gephyrin	GPHN	X
223380_s_at	large tumor suppressor kinase 2	LATS2	X
223480_s_at	mitochondrial ribosomal protein L47	MRPL47	X
223519_at	sterile alpha motif and leucine zipper containing kinase AZK	ZAK	X
223673_at	regulatory factor		X
223679_at	catenin (cadherin-associated protein), beta 1, 88kDa	CTNNB1	X
223880_x_at	chromosome 20 open reading frame 24	C20orf24
224151_s_at	adenylate kinase 3	AK3	X
224227_s_at	B double prime 1, subunit of RNA polymerase III transcription initiation factor IIIB	BDP1	X
224366_s_at	RALBP1 associated Eps domain containing 1	REPS1	X
224369_s_at	F-box protein 38	FB	X
224414_s_at	caspase recruitment domain family, member 6	CARD6	X
224462_s_at	coiled-coil-helix-coiled-coil-helix domain containing 6	CHCHD6
224509_s_at	reticulon 4 interacting protein 1	RTN4IP1
224568_x_at	metastasis associated lung adenocarcinoma transcript 1 (non-protein coding)	MALAT1	X
224598_at	mannosyl (alpha-1,3-)-glycoprotein beta-1,4-N-acetylglucosaminyltransferase, isozyme B	MGAT4B	X
224613_s_at	DnaJ (Hsp40) homolog, subfamily C, member 5	DNAJC5	X
224628_at	endoplasmic reticulum lectin 1	ERLEC1	X
224666_at	non-SMC element 1 homolog (S. cerevisiae)	NSMCE1	X
224689_at	mannosidase, beta A, lysosomal-like	MANBAL	X
224737_x_at	cell division cycle and apoptosis regulator 1	CCAR1	X
224739_at	Pim-3 proto-oncogene, serine/threonine kinase	PIM3	X
224774_s_at	neuron navigator 1	NAV1	X
224862_at	guanine nucleotide binding protein (G protein), q polypeptide	GNAQ	X
224878_at	ubiquitin family domain containing 1	UBFD1	X
224879_at	transmembrane protein 261	TMEM261
224972_at	reactive oxygen species modulator 1	ROMO1	X
224999_at	Data not found		X
225003_at	transmembrane protein 205	TMEM205	X
225050_at	zinc finger protein 512	ZNF512	X
225055_at	leucine rich repeat containing 37, member A16, pseudogene	LRRC37A16P	X
225056_at	signal-induced proliferation-associated 1 like 2	SIPA1L2
225092_at	rabaptin, RAB GTPase binding effector protein 1	RABEP1	X
225172_at	Crm, cramped-like (Drosophila)	CRAMP1L	X
225219_at	SMAD family member 5	SMAD5	X
225223_at	SMAD family member 5	SMAD5	X
225234_at	Cbl proto-oncogene, E3 ubiquitin protein ligase	CBL	X
225239_at	Data not found		X
225240_s_at	musashi RNA-binding protein 2	MSI2	X
225298_at	paroxysmal nonkinesigenic dyskinesia	PNKD	X
225330_at	insulin-like growth factor 1 receptor	IGF1R
225356_at	Data not found		X
225463_x_at	G protein-coupled receptor 89A	GPR89A	X
225484_at	centrosomal protein 41kDa	CEP41	X
225493_at	uncharacterized LOC144438	LOC144438	X
225496_s_at	synaptotagmin-like 2	SYTL2	X
225501_at	PHD finger protein 6	PHF6	X
225516_at	solute carrier family 7 (cationic amino acid transporter, y+ system), member 2	SLC7A2	X
225571_at	leukemia inhibitory factor receptor alpha	LIFR	X
225636_at	signal transducer and activator of transcription 2, 113kDa	STAT2	X
225649_s_at	serine/threonine kinase 35	STK35	X
225655_at	ubiquitin-like with PHD and ring finger domains 1	UHRF1	X
225660_at	sema domain, transmembrane domain (TM), and cytoplasmic domain, (semaphorin) 6A	SEMA6A
225750_at	Data not found		X
225864_at	family with sequence similarity 84, member B	FAM84B	X
225870_s_at	trafficking protein particle complex 5	TRAPPC5	X
225917_at	Data not found		X
225923_at	Data not found		X
225961_at	kelch-like family member 42	KLHL42	X
226037_s_at	TAF9B RNA polymerase II, TATA box binding protein (TBP)-associated factor, 31kDa	TAF9B	X
226086_at	synaptotagmin		X
226101_at	protein kinase C, epsilon	PRKCE	X
226112_at	sarcoglycan, beta (43kDa dystrophin-associated glycoprotein)	SGCB	X
226132_s_at	mannosidase, endo-alpha-like	MANEAL
226143_at	retinoic acid induced 1	RAI1	X
226169_at	SET binding factor 2	SBF2	X
226195_at	intraflagellar transport 43	IFT43	X
226223_at	Data not found		X
226397_s_at	Data not found
226447_at	ash1 (absent, small, or homeotic)-like (Drosophila)	ASH1L	X
226501_at			X
226520_at	ligand dependent nuclear receptor corepressor	LCOR
226528_at	metaxin 3	MT
226544_x_at	biogenesis of lysosomal organelles complex-1, subunit 5, muted	BLOC1S5	X
226625_at	transforming growth factor, beta receptor III	TGFBR3	X
226675_s_at	metastasis associated lung adenocarcinoma transcript 1 (non-protein coding)	MALAT1
226690_at	adenylate cyclase activating polypeptide 1 (pituitary) receptor type I	ADCYAP1R1	X
226718_at	adhesion molecule with Ig-like domain 1	AMIGO1	X
226886_at	glutamine--fructose-6-phosphate transaminase 1	GFPT1	X
226895_at	nuclear factor I/C (CCAAT-binding transcription factor)	NFIC	X
226898_s_at	splicing factor proline/glutamine-rich	SFPQ	X
226999_at	RNA-binding region (RNP1, RRM) containing 3	RNPC3	X
227062_at	Data not found
227066_at	MOB kinase activator 3C	MOB3C	X
227084_at	dystrobrevin, alpha	DTNA	X
227125_at	IL10RB antisense RNA 1 (head to head)	IL10RB-AS1
227229_at	vacuolar protein sorting 53 homolog (S. cerevisiae)	VPS53
227279_at	transcription elongation factor A (SII)-like 3	TCEAL3
227345_at	tumor necrosis factor receptor superfamily, member 10d, decoy with truncated death domain	TNFRSF10D
227405_s_at	frizzled class receptor 8	FZD8
227435_at	KIAA2018	KIAA2018	X
227441_s_at	ankyrin repeat and sterile alpha motif domain containing 1B	ANKS1B
227527_at	lysine (K)-specific methyltransferase 2D	KMT2D	X
227556_at	NME/NM23 family member 7	NME7	X
227663_at	Data not found		X
227772_at	Data not found		X
227784_s_at	component of oligomeric golgi complex 1	COG1
227792_at	inositol 1,4,5-trisphosphate receptor interacting protein-like 2	ITPRIPL2	X
227798_at	SMAD family member 1	SMAD1	X
227802_at	RUN and FYVE domain containing 3	RUFY3	X
227847_at	EPM2A (laforin) interacting protein 1	EPM2AIP1	X
227891_s_at	TAF15 RNA polymerase II, TATA box binding protein (TBP)-associated factor, 68kDa	TAF15	X
227944_at	protein tyrosine phosphatase, non-receptor type 3	PTPN3	X
227959_at	Data not found		X
228007_at	centrosomal protein 85kDa-like	CEP85L	X
228287_at	inhibitor of growth family, member 5	ING5	X
228487_s_at	Data not found		X
228516_at	codanin 1	CDAN1
228556_at	YTH domain containing 1	YTHDC1	X
228594_at	NAD kinase 2, mitochondrial	NADK2	X
228662_at	suppressor of cytokine signaling 7	SOCS7	X
228711_at	zinc finger protein 37A	ZNF37A
228839_s_at	uncharacterized LOC642361	LOC642361	X
228855_at	nudix (nucleoside diphosphate linked moiety		X
228974_at	Data not found		X
229065_at	solute carrier family 35, member F3	SLC35F3	X
229066_at	Data not found
229143_at	CCR4-NOT transcription complex, subunit 3	CNOT3	X
229145_at	anaphase promoting complex subunit 16	ANAPC16	X
229264_at	Data not found		X
229309_at	adrenoceptor beta 1	ADRB1	X
229315_at	Data not found		X
229353_s_at	nuclear casein kinase and cyclin-dependent kinase substrate 1	NUCKS1	X
229374_at	EPH receptor A4	EPHA4	X
229497_at	ankyrin repeat and death domain containing 1A	ANKDD1A	X
229531_at	Data not found		X
229537_at	LIM domain only 4	LMO4	X
229687_s_at	hypothetical protein LOC100287017	LOC100287017	X
229725_at	acyl-CoA synthetase long-chain family member 6	ACSL6	X
229966_at	EWS RNA-binding protein 1	EWSR1	X
230006_s_at	small VCP/p97-interacting protein	SVIP
230255_at	gamma-aminobutyric acid (GABA) A receptor, delta	GABRD	X
230280_at	tripartite motif containing 9	TRIM9	X
230296_at	chromosome 16 open reading frame 52	C16orf52	X
230326_s_at	chromosome 11 open reading frame 73	C11orf73
230379_x_at	NADH dehydrogenase (ubiquinone) complex I, assembly factor 7	NDUFAF7	X
230392_at	Data not found		X
230590_at	Data not found
230621_at	isoamyl acetate-hydrolyzing esterase 1 homolog (S. cerevisiae)	IAH1	X
230656_s_at	cirrhosis, autosomal recessive 1A (cirhin)	CIRH1A	X
230713_at	Data not found		X
230790_x_at	Data not found		X
230885_at	spastic paraplegia 7 (pure and complicated autosomal recessive)	SPG7	X
230923_at	family with sequence similarity 19 (chemokine (C-C motif)-like), member A1	FAM19A1	X
231015_at	Kruppel-like factor 15	KLF15
231016_s_at	aryl hydrocarbon receptor nuclear translocator	ARNT
231281_at	Data not found		X
231329_at	Data not found		X
231387_at	hypothetical protein LOC100289494	LOC100289494	X
231530_s_at	chromosome 11 open reading frame 1	C11orf1	X
231577_s_at	guanylate binding protein 1, interferon-inducible	GBP1
231735_s_at	metastasis associated lung adenocarcinoma transcript 1 (non-protein coding)	MALAT1
231887_s_at	phosphatase domain containing, paladin 1	PALD1
231986_at	regulating synaptic membrane exocytosis 1	RIMS1	X
232012_at	calpain 1, (mu/I) large subunit	CAPN1	X
232173_at	C-type lectin domain family 2, member L	CLEC2L	X
232207_at	glucuronidase, beta pseudogene 4	GUSBP4
232215_x_at	proline rich 11	PRR11	X
232216_at	YME1-like 1 ATPase	YME1L1
232264_at	Data not found
232280_at	solute carrier family 25 (mitochondrial carnitine/acylcarnitine carrier), member 29	SLC25A29
232288_at	In multiple Geneids		X
232311_at	beta-2-microglobulin	B2M	X
232386_at	vacuolar protein sorting 13 homolog C (S. cerevisiae)	VPS13C	X
232653_at	Data not found		X
232735_at	ankyrin repeat domain 34A	ANKRD34A	X
232797_at	Data not found		X
233037_at	Data not found		X
233039_at	Data not found		X
233216_at	zinc finger, DHHC-type containing 21	ZDHHC21	X
233313_at	Data not found		X
233319_x_at	Data not found		X
233359_at	Data not found
233405_at	Data not found		X
233437_at	gamma-aminobutyric acid (GABA) A receptor, alpha 4	GABRA4	X
233647_s_at	cytidine and dCMP deaminase domain containing 1	CDADC1	X
233702_x_at	Data not found		X
233816_at	Data not found		X
233908_x_at	Data not found		X
234081_at	Data not found		X
234163_at	ubiquitin protein ligase E3A	UBE3A	X
234562_x_at	Data not found
234578_at	Data not found		X
234723_x_at	Data not found		X
234969_s_at	enhancer of polycomb homolog 1 (Drosophila)	EPC1	X
234981_x_at	carboxymethylenebutenolidase homolog (Pseudomonas)	CMBL	X
234989_at	Data not found		X
234997_x_at	Data not found		X
235049_at	adenylate cyclase 1 (brain)	ADCY1	X
235079_at	Data not found
235112_at	Data not found
235200_at	zinc finger protein 561	ZNF561	X
235288_at	Data not found		X
235327_x_at	UB
235461_at	tet methylcytosine dioxygenase 2	TET2	X
235484_at	protein prenyltransferase alpha subunit repeat containing 1	PTAR1
235562_at	chromosome 3 open reading frame 70	C3orf70	X
235567_at	RAR-related orphan receptor A	RORA	X
235575_at	Data not found		X
235601_at	Data not found
235697_at	Data not found		X
235730_at	Data not found		X
235789_at	lysine (K)-specific demethylase 4B	KDM4B	X
235887_at	Data not found		X
235964_x_at	Data not found		X
236131_at	Data not found
236139_at	Data not found		X
236265_at	Sp4 transcription factor	SP4	X
236268_at	SEC22 vesicle trafficking protein homolog C (S. cerevisiae)	SEC22C	X
236274_at	eukaryotic translation initiation factor 3, subunit B	EIF3B	X
236283_x_at	p21 protein (Cdc42/Rac)-activated kinase 2 pseudogene	LOC646214	X
236338_at	Data not found		X
236429_at	zinc finger protein 83	ZNF83	X
236439_at	Data not found
236484_at	Data not found		X
236488_s_at	Data not found		X
236571_at	Data not found
236752_at	Data not found		X
236783_at	Kv channel interacting protein 4	KCNIP4	X
236901_at	Data not found		X
236934_at	Data not found		X
236949_at	Data not found		X
237018_at	Data not found		X
237040_at	CWF19-like 2, cell cycle control (S. pombe)	CWF19L2	X
237106_at	solute carrier family 11 (proton-coupled divalent metal ion transporter), member 2	SLC11A2
237600_at	Data not found		X
237747_at	Data not found
237768_x_at	Data not found		X
237798_at	Data not found		X
238017_at	short chain dehydrogenase/reductase family 16C, member 5	SDR16C5	X
238115_at	DnaJ (Hsp40) homolog, subfamily C, member 18	DNAJC18	X
238130_at	nuclear factor of activated T-cells, cytoplasmic, calcineurin-dependent 2 interacting protein	NFATC2IP	X
238147_at	tripartite motif containing 46	TRIM46	X
238346_s_at	trimethylguanosine synthase 1	TGS1	X
238470_at	Sys1 golgi trafficking protein	SYS1	X
238525_at	DEAD (Asp-Glu-Ala-Asp) box helicase 56	DD	X
238558_at	Data not found		X
238560_at	calcium binding and coiled-coil domain 2	CALCOCO2	X
238595_at	Data not found
238602_at	DIS3 like 3'-5' exoribonuclease 2	DIS3L2	X
238711_s_at	zinc finger protein 148	ZNF148
238716_at	family with sequence similarity 85, member A	FAM85A	X
238736_at	REV3-like, polymerase (DNA directed), zeta, catalytic subunit	REV3L	X
238761_at	ELK4, ETS-domain protein (SRF accessory protein 1)	ELK4	X
238812_at	Data not found		X
238851_at	ankyrin repeat domain 13A	ANKRD13A	X
238919_at	Data not found		X
239026_x_at	ArfGAP with GTPase domain, ankyrin repeat and PH domain 3	AGAP3	X
239035_at	methylenetetrahydrofolate reductase (NAD(P)H)	MTHFR	X
239090_at	family with sequence similarity 161, member A	FAM161A
239096_at	Data not found		X
239102_s_at	Data not found		X
239167_at	Data not found
239179_at	Data not found		X
239333_x_at	Data not found		X
239469_at	Data not found		X
239497_at	Data not found		X
239629_at	CASP8 and FADD-like apoptosis regulator	CFLAR	X
239678_at	Data not found		X
239757_at	zinc finger, AN1-type domain 6	ZFAND6	X
239831_at	transmembrane protein 106C	TMEM106C	X
240005_at	Data not found		X
240018_at	Data not found		X
240139_at	Data not found
240331_at	Data not found		X
240432_x_at	Kruppel-like factor 7 (ubiquitous)	KLF7
240532_at	solute carrier family 32 (GABA vesicular transporter), member 1	SLC32A1	X
240544_at	Data not found
240554_at	A kinase (PRKA) anchor protein 8-like	AKAP8L	X
240602_at	HBS1-like translational GTPase	HBS1L	X
240758_at	Data not found		X
240948_at	Data not found		X
241216_at	Data not found		X
241389_at	cholinergic receptor, nicotinic, beta 2 (neuronal)	CHRNB2	X
241391_at	Data not found		X
241727_x_at	dihydrofolate reductase-like 1	DHFRL1	X
241741_at	cardiolipin synthase 1	CRLS1	X
241762_at	F-box protein 32	FB
241769_at	Data not found
241786_at	Data not found		X
241798_at	Data not found		X
241893_at	Data not found		X
241954_at	farnesyl-diphosphate farnesyltransferase 1	FDFT1	X
242136_x_at	C-terminal binding protein 2 pseudogene	MGC70870	X
242195_x_at	numb homolog (Drosophila)-like	NUMBL	X
242239_at	Data not found		X
242240_at	Data not found		X
242319_at	diacylglycerol kinase, gamma 90kDa	DGKG	X
242326_at	collagen, type
242343_x_at	Data not found		X
242372_s_at	major facilitator superfamily domain containing 4	MFSD4
242407_at	Data not found		X
242413_at	Data not found		X
242428_at	DCN1, defective in cullin neddylation 1, domain containing 1	DCUN1D1
242431_at	Data not found
242578_x_at	solute carrier family 22 (organic cation transporter), member 3	SLC22A3	X
242609_x_at	Data not found
242688_at	Data not found		X
242712_x_at	In multiple Geneids		X
242801_at	Data not found
242819_at	Data not found
242829_x_at	F-box and leucine-rich repeat protein 3	FB	X
242837_at	serine/arginine-rich splicing factor 4	SRSF4	X
242916_at	centriolin	CNTRL
242973_at	calcium channel, voltage-dependent, L type, alpha 1C subunit	CACNA1C	X
243025_at	Data not found		X
243275_at	Data not found		X
243318_at	DDB1 and CUL4 associated factor 8	DCAF8	X
243329_at	Data not found		X
243525_at	Data not found		X
243561_at	Data not found		X
243593_s_at	Data not found		X
243617_at	zinc finger protein 827	ZNF827	X
243618_s_at	zinc finger protein 827	ZNF827
243648_at	zinc finger, BED-type containing 6	ZBED6	X
243704_at	Data not found		X
243713_at	Data not found
243745_at	Data not found
243791_at	Data not found		X
243827_at	Data not found		X
243993_at	Data not found
244027_at	Data not found		X
244040_at	Data not found
244042_x_at	Data not found
244045_at	Data not found		X
244248_at	tetratricopeptide repeat domain 27	TTC27	X
244511_at	Data not found		X
244607_at	Data not found
244610_x_at	Data not found		X
244673_at	Data not found		X
244778_x_at	Data not found		X
244803_at	Data not found		X
244859_at	Data not found		X
31874_at	growth arrest-specific 2 like 1	GAS2L1	X
32069_at	NEDD4 binding protein 1	N4BP1	X
32099_at	scaffold attachment factor B2	SAFB2
33148_at	zinc finger RNA binding protein	ZFR	X
35436_at	golgin A2	GOLGA2	X
36129_at	small G protein signaling modulator 2	SGSM2	X
36711_at	v-maf avian musculoaponeurotic fibrosarcoma oncogene homolog F	MAFF	X
37012_at	capping protein (actin filament) muscle Z-line, beta	CAPZB	X
37996_s_at	dystrophia myotonica-protein kinase	DMPK	X
38710_at	OTU deubiquitinase, ubiquitin aldehyde binding 1	OTUB1	X
39313_at	WNK lysine deficient protein kinase 1	WNK1
40569_at	myeloid zinc finger 1	MZF1	X
41220_at	septin 9	SEPT9	X
41387_r_at	lysine (K)-specific demethylase 6B	KDM6B
43427_at	acetyl-CoA carboxylase beta	ACACB	X
43544_at	mediator complex subunit 16	MED16	X
46665_at	sema domain, immunoglobulin domain (Ig), transmembrane domain (TM) and short cytoplasmic domain, (semaphorin) 4C	SEMA4C	X
49077_at	protein phosphatase methylesterase 1	PPME1	X
49306_at	Ras association (RalGDS/AF-6) domain family member 4	RASSF4
49452_at	acetyl-CoA carboxylase beta	ACACB	X
51774_s_at	hypothetical protein LOC222070	LOC222070	X
63825_at	abhydrolase domain containing 2	ABHD2	X
81811_at	Data not found		X

## Sheet: CABK-Pathways
Pathway Name	List Hits	List Total	EASE score	Gene List
Metabolism of Complex Lipids	6	75	2.82e-06	DGKG; INPP4A; LPL; SGPL1; TPI1; YWHAZ
Amino Acid Metabolism	6	75	2.99e-06	ACAA1; ADSL; GFPT1; GOT2; GSS; PDHA1
Folate biosynthesis	1	75	3.48e-06	DHFR
Cell Growth and Death	5	75	1e-05	ESPL1; PTPN2; PTPN3; PTPRD; RB1
Carbohydrate Metabolism	12	75	1.31e-05	ACACB; ALDOA; GRHPR; IDH3A; IDH3B; IDH3G; ME3; PDHA1; PFKFB3; PFKM; PRPS1; TPI1
Valine, leucine and isoleucinebiosynthesis	1	75	1.76e-05	PDHA1
Glyoxylate and dicarboxylatemetabolism	1	75	1.88e-05	GRHPR
Lipid Metabolism	4	75	1.889e-05	ACAA1; ACACB; HSD17B7; NQO2
Alzheimer's disease	2	75	8.11e-05	LPL; SNCA
Galactose metabolism	1	75	8.11e-05	PFKM
Citrate cycle (TCA cycle)	3	75	8.11e-05	IDH3A; IDH3B; IDH3G
ATP synthesis	3	75	0.000188	ATP5G1; ATP5J2; ATP6V1F
Cell Communication	2	75	0.000188	CAV2; SORBS1
MAPKsignaling pathway	1	75	0.000575	EGFR
Glutathione metabolism	1	75	0.000681	GSS
Pentose phosphate pathway	3	75	0.000716	ALDOA; PFKM; PRPS1
Arginine and proline metabolism	1	75	0.000742	GOT2
Pyruvate metabolism	4	75	0.00109	ACACB; GRHPR; ME3; PDHA1
Huntington's disease	1	75	0.00115	CREBBP
Bile acid biosynthesis	1	75	0.00121	ACAA1
Sorting and Degradation	9	75	0.00142	ANAPC5; CDC16; CUL3; PSMB2; PSMB3; PSMB6; PSMC2; PSMD14; TCEB2
Inositol phosphatemetabolism	1	75	0.00159	INPP4A
Benzoate degradation viahydroxylation	1	75	0.00163	ACAA1
Signal Transduction	10	75	0.0022	DGKG; EGFR; INPP4A; ITPR2; PRKCA; PRKCE; PRKCZ; PTPN2; PTPN3; PTPRD
Butanoate metabolism	1	75	0.00309	PDHA1
Oxidative phosphorylation	8	75	0.00319	ATP5G1; ATP5J2; ATP6V1F; NDUFA10; NDUFA7; NDUFA9; NDUFS6; UQCRB
Fructose and mannose metabolism	4	75	0.00332	ALDOA; PFKFB3; PFKM; TPI1
Parkinson's disease	1	75	0.00336	SNCA
Metabolism of Other Amino Acids	1	75	0.00341	GSS
Phospholipid degradation	1	75	0.00354	YWHAZ
Glutamate metabolism	3	75	0.00361	GFPT1; GOT2; GSS
Purine metabolism	7	75	0.00378	ADCY1; ADSL; AK3; ENTPD6; GUCY1A3; NME7; PRPS1
Glycerolipid metabolism	4	75	0.00378	DGKG; LPL; TPI1; YWHAZ
RNA polymerase	1	75	0.00575	POLR2C
Biosynthesis of Secondary Metabolites	2	75	0.00575	ACACB; GOT2
Cysteine metabolism	1	75	0.00575	GOT2
Inositol metabolism	1	75	0.00575	TPI1
One carbon pool byfolate	1	75	0.00575	DHFR
Fatty acid biosynthesis (path 2)	1	75	0.00575	ACAA1
Apoptosis	3	75	0.00575	PTPN2; PTPN3; PTPRD
Sphingoglycolipidmetabolism	1	75	0.00575	SGPL1
Phenylalanine metabolism	1	75	0.00575	GOT2
Riboflavinmetabolism	3	75	0.0058	PTPN2; PTPN3; PTPRD
Fatty acid metabolism	1	75	0.00585	ACAA1
Valine, leucine and isoleucinedegradation	1	75	0.00587	ACAA1
Pyrimidine metabolism	3	75	0.00592	DUT; ENTPD6; NME7
Basal transcriptionfactors	1	75	0.00597	GTF2I
Nucleotide Metabolism	8	75	0.00602	ADCY1; ADSL; AK3; DUT; ENTPD6; GUCY1A3; NME7; PRPS1
Androgen and estrogen metabolism	1	75	0.00605	HSD17B7
Biodegradation of Xenobiotics	4	75	0.0061111	ACAA1; PTPN2; PTPN3; PTPRD
Prion disease	2	75	0.00623	LAMC1; NFE2L2
Phosphatidylinositol signaling system	9	75	0.00632	DGKG; INPP4A; ITPR2; PRKCA; PRKCE; PRKCZ; PTPN2; PTPN3; PTPRD
Carbon fixation	4	75	0.00658	ALDOA; GOT2; ME3; TPI1
Ubiquitinmediated proteolysis	4	75	0.00664	ANAPC5; CDC16; CUL3; TCEB2
Fatty acid biosynthesis (path 1)	1	75	0.00674	ACACB
Aminosugarsmetabolism	1	75	0.00694	GFPT1
Propanoate metabolism	1	75	0.00711118	ACACB
Transcription	2	75	0.00827	GTF2I; POLR2C
Prostaglandin andleukotriene metabolism	1	75	0.00858	YWHAZ
Alanine and aspartate metabolism	2	75	0.0095	ADSL; GOT2
Tyrosine metabolism	1	75	0.0111	GOT2
Tetracyclinebiosynthesis	1	75	0.0575	ACACB
Phenylalanine, tyrosine andtryptophan biosynthesis	1	75	0.0575	GOT2
Sterol biosynthesis	1	75	0.0575	NQO2
Alkaloidbiosynthesis I	1	75	0.0575	GOT2
Energy Metabolism	12	75	0.0575	ALDOA; ATP5G1; ATP5J2; ATP6V1F; GOT2; ME3; NDUFA10; NDUFA7; NDUFA9; NDUFS6; TPI1; UQCRB
Metabolism of Cofactors and Vitamins	7	75	0.0575	BLVRA; BLVRB; DHFR; PTPN2; PTPN3; PTPRD; UROS
Porphyrin andchlorophyll metabolism	3	75	1	BLVRA; BLVRB; UROS
Glycolysis / Gluconeogenesis	4	75	1	ALDOA; PDHA1; PFKM; TPI1
Metabolism of Complex Carbohydrates	2	75	1	GFPT1; MGAT4B
Ribosome	5	75	1	RPL15; RPL17; RPL3; RPL4; RPL7A
Neurodegenerative Disorders	5	75	1	CREBBP; LAMC1; LPL; NFE2L2; SNCA
Cell cycle	5	75	1	ESPL1; PTPN2; PTPN3; PTPRD; RB1
Proteasome	5	75	1	PSMB2; PSMB3; PSMB6; PSMC2; PSMD14
Translation	5	75	1	RPL15; RPL17; RPL3; RPL4; RPL7A
N-Glycansbiosynthesis	1	75	1	MGAT4B
gamma Hexachlorocyclohexane degradation	3	75	1	PTPN2; PTPN3; PTPRD
integrin mediated celladhesion	2	75	1	CAV2; SORBS1

## Sheet: GABK-Pathways
Pathway Name	List Hits	List Total	EASE Score	Gene List
Folate biosynthesis	1	81	6.38e-08	DHFR
Carbohydrate Metabolism	11	81	5.9e-07	ABAT; ACACB; AKR1B1; GRHPR; IDH3A; IDH3B; ME3; PDHA1; PFKM; PRPS1; TPI1
Valine, leucine and isoleucinebiosynthesis	1	81	7.31e-07	PDHA1
Glyoxylate and dicarboxylatemetabolism	1	81	7.31e-07	GRHPR
MAPKsignaling pathway	1	81	8.84e-07	EGFR
Lipid Metabolism	4	81	1.41e-06	ACAA1; ACACB; HSD17B7; NQO2
Alzheimer's disease	3	81	1.5e-06	GNG3; LPL; SNCA
Galactose metabolism	2	81	1.76e-06	AKR1B1; PFKM
Citrate cycle (TCA cycle)	2	81	2.1e-06	IDH3A; IDH3B
ATP synthesis	6	81	2.1e-06	ATP5B; ATP5G1; ATP5J2; ATP6V0B; ATP6V1E1; ATP6V1F
Cell Communication	3	81	2.1e-06	CAPNS1; SORBS1; TLN2
Glutathione metabolism	1	81	2.14e-06	GSS
Pentose phosphate pathway	2	81	2.23e-06	PFKM; PRPS1
Amino Acid Metabolism	8	81	2.23e-06	ABAT; ACAA1; ADSL; EPRS; GFPT1; GOT2; GSS; PDHA1
Arginine and proline metabolism	2	81	2.45e-06	EPRS; GOT2
Signal Transduction	9	81	2.66e-06	DGKG; EGFR; INPP4A; PRKCA; PRKCE; PRKCZ; PTPN3; PTPRD; PTPRM
Butanoate metabolism	2	81	2.73e-05	ABAT; PDHA1
Oxidative phosphorylation	12	81	2.87e-05	ATP5B; ATP5G1; ATP5J2; ATP6V0B; ATP6V1E1; ATP6V1F; COX5B; NDUFA10; NDUFA9; NDUFS6; UQCRB; UQCRC2
Cell cycle	5	81	3.27e-05	ESPL1; PTPN3; PTPRD; PTPRM; RB1
Fructose and mannose metabolism	3	81	3.38e-05	AKR1B1; PFKM; TPI1
Parkinson's disease	1	81	3.54e-05	SNCA
Metabolism of Other Amino Acids	2	81	3.54e-05	ABAT; GSS
Neurodegenerative Disorders	6	81	3.54e-05	CREBBP; GNG3; LAMC1; LPL; NFE2L2; SNCA
Glutamate metabolism	5	81	3.54e-05	ABAT; EPRS; GFPT1; GOT2; GSS
Purine metabolism	8	81	3.54e-05	ADCY1; ADSL; AK3; ENTPD6; GUCY1A3; IMPDH2; NME7; PRPS1
Glycerolipid metabolism	6	81	3.54e-05	AKR1B1; DGKG; LPL; PAFAH1B1; TPI1; YWHAZ
Pentose and glucuronateinterconversions	1	81	3.54e-05	AKR1B1
Pyruvate metabolism	5	81	3.68e-05	ACACB; AKR1B1; GRHPR; ME3; PDHA1
Huntington's disease	1	81	3.72e-05	CREBBP
Bile acid biosynthesis	1	81	4.67e-05	ACAA1
Immune System	1	81	4.67e-05	PLG
Sorting and Degradation	8	81	4.67e-05	ANAPC5; CDC16; CUL3; PSMB2; PSMB3; PSMC2; PSMD14; TCEB2
Inositol phosphatemetabolism	1	81	4.67e-05	INPP4A
Benzoate degradation viahydroxylation	1	81	4.67e-05	ACAA1
Phospholipid degradation	1	81	4.7e-05	YWHAZ
RNA polymerase	1	81	4.7e-05	POLR2C
Riboflavinmetabolism	3	81	4.7e-05	PTPN3; PTPRD; PTPRM
Fatty acid metabolism	1	81	6.42e-05	ACAA1
Valine, leucine and isoleucinedegradation	1	81	6.43e-05	ACAA1
Complement andcoagulation cascades	1	81	6.44e-05	PLG
Pyrimidine metabolism	4	81	6.79e-05	DTYMK; DUT; ENTPD6; NME7
Basal transcriptionfactors	1	81	6.79e-05	GTF2I
Nucleotide Metabolism	10	81	6.79e-05	ADCY1; ADSL; AK3; DTYMK; DUT; ENTPD6; GUCY1A3; IMPDH2; NME7; PRPS1
Androgen and estrogen metabolism	1	81	6.79e-05	HSD17B7
Biodegradation of Xenobiotics	4	81	6.79e-05	ACAA1; PTPN3; PTPRD; PTPRM
Prion disease	2	81	6.98e-05	LAMC1; NFE2L2
Phosphatidylinositol signaling system	8	81	7.11e-05	DGKG; INPP4A; PRKCA; PRKCE; PRKCZ; PTPN3; PTPRD; PTPRM
Carbon fixation	3	81	7.24e-05	GOT2; ME3; TPI1
Ubiquitinmediated proteolysis	4	81	7.24e-05	ANAPC5; CDC16; CUL3; TCEB2
Fatty acid biosynthesis (path 1)	1	81	7.24e-05	ACACB
Biosynthesis of Secondary Metabolites	2	81	8.14e-05	ACACB; GOT2
Apoptosis	4	81	8.5e-05	NFKBIA; PTPN3; PTPRD; PTPRM
Aminosugarsmetabolism	1	81	0.000724	GFPT1
Propanoate metabolism	2	81	0.000731	ABAT; ACACB
Transcription	2	81	0.000736	GTF2I; POLR2C
Metabolism of Complex Lipids	8	81	0.000738	AKR1B1; DGKG; INPP4A; LPL; PAFAH1B1; SGPL1; TPI1; YWHAZ
Prostaglandin andleukotriene metabolism	1	81	0.000739	YWHAZ
Alanine and aspartate metabolism	3	81	0.000766	ABAT; ADSL; GOT2
Tyrosine metabolism	1	81	0.000786	GOT2
Glycolysis / Gluconeogenesis	3	81	0.000992	PDHA1; PFKM; TPI1
Cysteine metabolism	1	81	0.00821	GOT2
Translation	3	81	0.00821	EPRS; RPL15; RPL3
Inositol metabolism	1	81	0.00821	TPI1
One carbon pool byfolate	1	81	0.00821	DHFR
Ribosome	2	81	0.00821	RPL15; RPL3
Fatty acid biosynthesis (path 2)	1	81	0.00821	ACAA1
Cell Growth and Death	6	81	0.00831	ESPL1; NFKBIA; PTPN3; PTPRD; PTPRM; RB1
Sphingoglycolipidmetabolism	1	81	0.0085	SGPL1
Phenylalanine metabolism	1	81	0.00854	GOT2
Tetracyclinebiosynthesis	1	81	0.00864	ACACB
Phenylalanine, tyrosine andtryptophan biosynthesis	1	81	0.088	GOT2
Proteasome	4	81	0.0884	PSMB2; PSMB3; PSMC2; PSMD14
Sterol biosynthesis	1	81	0.0925	NQO2
Alkaloidbiosynthesis I	1	81	0.0925	GOT2
Energy Metabolism	15	81	0.0925	ATP5B; ATP5G1; ATP5J2; ATP6V0B; ATP6V1E1; ATP6V1F; COX5B; GOT2; ME3; NDUFA10; NDUFA9; NDUFS6; TPI1; UQCRB; UQCRC2
Metabolism of Complex Carbohydrates	2	81	0.0958	GFPT1; MGAT4B
Metabolism of Cofactors and Vitamins	8	81	0.0959	BLVRA; BLVRB; DHFR; EPRS; PTPN3; PTPRD; PTPRM; UROS
beta Alanine metabolism	1	81	0.0974	ABAT
N Glycansbiosynthesis	1	81	0.0974	MGAT4B
gamma Hexachlorocyclohexane degradation	3	81	0.0974	PTPN3; PTPRD; PTPRM
Porphyrin andchlorophyll metabolism	4	81	0.0992	BLVRA; BLVRB; EPRS; UROS
Integrin mediated celladhesion	3	81	0.974	CAPNS1; SORBS1; TLN2
aminoacyl tRNAbiosynthesis	1	81	0.974	EPRS
